1 **TTL proteins scaffold brassinosteroid signaling components at the**  
2 **plasma membrane to optimize signal transduction in plant cells**

3  
4 Vítor Amorim-Silva<sup>1</sup>, Álvaro García-Moreno<sup>1</sup>, Araceli G. Castillo<sup>2</sup>, Naoufal  
5 Lakhssassi<sup>3</sup>, Jessica Pérez-Sancho<sup>1</sup>, Yansha Li<sup>4</sup>, Alicia Esteban del Valle<sup>1</sup>,  
6 David Posé<sup>1</sup>, Josefa Pérez-Rodríguez<sup>1</sup>, Jinxing Lin<sup>5</sup>, Victoriano Valpuesta<sup>1</sup>,  
7 Omar Borsani<sup>6</sup>, Cyril Zipfel<sup>7,8</sup>, Alberto P. Macho<sup>4,7</sup>, Miguel A. Botella<sup>1,9,\*</sup>

8  
9 <sup>1</sup>Departamento de Biología Molecular y Bioquímica. Instituto de Hortofruticultura Subtropical y  
10 Mediterránea “La Mayora”, Universidad de Malaga-Consejo Superior de Investigaciones  
11 Científicas (IHSM-UMA-CSIC), Universidad de Málaga, Campus Teatinos, 29071  
12 Málaga, Spain

13 <sup>2</sup>Departamento de Biología Celular, Genética y Fisiología. Instituto de Hortofruticultura  
14 Subtropical y Mediterránea “La Mayora”, Universidad de Malaga-Consejo Superior de  
15 Investigaciones Científicas (IHSM-UMA-CSIC), Universidad de Málaga, Campus Teatinos,  
16 29071 Málaga, Spain

17 <sup>3</sup>Department of Plant, Soil and Agricultural Systems, Southern Illinois University, Carbondale, IL  
18 62901, USA.

19 <sup>4</sup>Shanghai Center for Plant Stress Biology, CAS Center for Excellence in Molecular Plant  
20 Sciences, Shanghai Institutes of Biological Sciences, Chinese Academy of Sciences (CAS),  
21 Shanghai, China

22 <sup>5</sup>College of Biological Sciences and Technology, Beijing Forestry University, Beijing 100083,  
23 China

24 <sup>6</sup>Departamento de Biología Vegetal, Laboratorio de Bioquímica, Facultad de Agronomía,  
25 Montevideo, Uruguay

26 <sup>7</sup>The Sainsbury Laboratory, Norwich Research Park, Norwich, NR4 7UH, United Kingdom

27 <sup>8</sup>Institute of Plant and Microbial Biology, Zurich-Basel Plant Science Center, University of Zurich,  
28 CH-8008 Zurich, Switzerland.

29 <sup>9</sup>Lead Contact

30  
31 \*Correspondence: [mabotella@uma.es](mailto:mabotella@uma.es)

32

33

34

35

36 **Abstract**

37 Brassinosteroids (BRs) form a group of steroidal hormones essential for plant  
38 growth, development and stress responses. Here, we report that plant-specific  
39 TETRATRICOPEPTIDE THIOREDOXIN-LIKE (TTL) proteins are positive  
40 regulators of BR signaling functioning as scaffold for BR signaling components  
41 in Arabidopsis. TTL3 forms a complex with all core components involved in BR  
42 signaling, including the receptor kinase BRASSINOSTEROID INSENSITIVE1  
43 (BRI1), the transcription factor BRASSINAZOLE RESISTANT1 (BZR1) and the  
44 phosphatase BRI1-SUPPRESSOR1 (BSU1), but excluding the co-receptor  
45 BAK1. TTL3 is mainly localized in the cytoplasm, but BR treatment increases its  
46 localization at the plasma membrane, where it strengthens the association with  
47 BR signaling components. Consistent with a role in BR signaling, mutations in  
48 *TTL3* and related *TTL1* and *TTL4* genes cause reduced BR responsiveness.  
49 We propose a mechanistic model for BR signaling, in which cytoplasmic/nuclear  
50 BR components bound to TTL proteins are recruited to the plasma membrane  
51 upon BR perception, which in turn allows the assembly of a BR signaling  
52 complex, leading to the de-phosphorylation and nuclear accumulation of the  
53 transcription factors BZR1 and BES1.

## 54 **Introduction**

55 Plants live in constantly changing environments that are often unfavorable or  
56 stressful for growth and development. In these conditions it is essential to  
57 balance growth and stress responses to ensure proper allocation of resources <sup>1</sup>.  
58 While an active growth causes the generation of new roots and leaves, allowing  
59 a better exploitation of environmental resources, it can also cause the depletion  
60 of resources that could be important for the survival under stress episodes <sup>2,3</sup>.  
61 Brassinosteroids (BRs) are a family of growth-promoting hormones having  
62 essential roles in a wide range of developmental and physiological processes  
63 <sup>2,4,5</sup>. However, in addition to their well-established function in growth, essential  
64 roles in the trade-off between growth and tolerance to biotic and abiotic stress  
65 episodes are now being unveiled <sup>6-9</sup>.

66 BRs are perceived at the plasma membrane by ligand-induced heterodimers of  
67 the receptors kinases BRASSINOSTEROID INSENSITIVE1 (BRI1) and  
68 SOMATIC EMBRYOGENESIS RECEPTOR KINASE (SERK) protein family-  
69 members, which activates an interconnected signal transduction cascade,  
70 leading to the transcriptional regulation of BR-responsive genes <sup>5</sup>. BRI1  
71 KINASE INHIBITOR 1 (BKI1) dissociates from activated BRI1, which  
72 phosphorylates the kinases BR-SIGNALING KINASE1 (BSK1) and the  
73 CONSTITUTIVE DIFFERENTIAL GROWTH1 (CDG1), which in turn  
74 phosphorylate the phosphatase BRI1-SUPPRESSOR1 (BSU1). Then, the  
75 active (phosphorylated) BSU1 lead to dephosphorylation and inactivation of the  
76 glycogen synthase kinase 3 (GSK3)-like BRASSINOSTEROID INSENSITIVE2  
77 (BIN2), a key regulator in BR signaling. In the absence of BRs, BIN2 is active  
78 and phosphorylates the two homologous transcription factors BRASSINAZOLE  
79 RESISTANT1 (BZR1) and BRI1-ETHYL METHANESULFONATE  
80 SUPPRESSOR 1 (BES1/BZR2), which results in their inactivation and  
81 degradation. In contrast, when BR is present, BIN2 is inactivated and degraded  
82 by the proteasome, which leads to both the stabilization and activation of BZR1  
83 and BES1, and therefore to transcriptional regulation of BR-responsive genes  
84 <sup>5,10</sup>.

85

86 In Arabidopsis, the *TETRATRICOPEPTIDE THIOREDOXIN-LIKE (TTL)* gene  
87 family is composed of four members (*TTL1* to *TTL4*) and mutations in *TTL1*,  
88 *TTL3*, and *TTL4* genes cause reduced growth under abiotic stresses such as  
89 salinity and drought<sup>11-13</sup>. This stress hypersensitivity is exacerbated in double  
90 and triple *ttl* mutants<sup>12</sup>. The *TTL2* gene is specifically expressed in pollen  
91 grains and does not have a role in stress tolerance, but it is important for male  
92 sporogenesis<sup>12</sup>. *TTL* genes encode proteins with a common modular  
93 architecture containing six Tetratricopeptide Repeat (TPR) domains distributed  
94 in specific positions throughout the sequence and a C-terminal sequence with  
95 homology to thioredoxins<sup>11,12</sup>. TPR domains are well-described protein-protein  
96 interaction modules, however how TTL proteins function mechanistically in  
97 stress tolerance remains elusive.

98 Several evidences point to a role of TTL proteins in BR responses, which open  
99 the possibility of a direct link between stress tolerance and BR-signaling by the  
100 TTL proteins. First, the TTL3 protein, whose gene is the most expressed among  
101 the *TTL* gene family, was identified as an interacting partner of the activated  
102 (phosphorylated) cytoplasmic domain of VASCULAR HIGHWAY1/BRI1-LIKE  
103 RECEPTOR KINASE2 (BRL2). Although BRL2 cannot bind BRs (Belkhadir,  
104 2015), it is a receptor-like kinase homologous to BRI1 with a role in vascular  
105 development<sup>13</sup>. Second, a *ttl3* mutant showed altered growth in the presence of  
106 exogenous BRs<sup>13</sup>. Third, TTL proteins are predicted to interact and function as  
107 co-chaperones of Hsp90<sup>14</sup>, which has been recently identified to have  
108 important roles in BR signaling by interacting with specific BR signaling  
109 components<sup>15-18</sup>. Fourth, a triple *ttl1 ttl3 ttl4* mutant in *TTL1*, *TTL3*, and *TTL4*  
110 shows defects in vasculature development and male sporogenesis, hallmarks of  
111 BR defective mutants<sup>12,19</sup>. Finally, *TTL1*, *TTL3*, and *TTL4* genes are specifically  
112 induced by BR application but not by other hormones<sup>14</sup>.

113 Based on phenotypic and molecular analyses we show that *TTL1*, *TTL3*, and  
114 *TTL4* genes, in addition to their reported role in abiotic stress tolerance, are  
115 positive regulators of BR signaling. The well-described TPR protein interaction  
116 modules of TTL proteins and their role in the assembly of multiprotein  
117 complexes<sup>20-22</sup> led us to hypothesize that these proteins could function as  
118 scaffold for BR signaling. Indeed, we show that TTL3 interacts with BRI1, BSU1

119 and BZR1 and associates *in vivo* with the majority of BR signaling components  
120 but not with BAK1. We also show that a functional TTL3 tagged with a Green  
121 Fluorescent Protein (GFP) shows a dual cytoplasmic and plasma membrane  
122 localization that is dependent on endogenous BR content. Furthermore TTL3  
123 highly enhances the interaction between BSK1 and BZR1. Taking together  
124 these results, we reveal that TTL proteins function in BR-regulated stress  
125 tolerance in plants and propose a model in which TTL proteins function in  
126 optimizing BR signal transduction by acting as a scaffold of BR signaling  
127 components.

128

## 129 **Results**

### 130 ***TTL3 interacts with a BAK1-independent phosphomimetic BRI1 mutant***

131 The TTL3 protein (also known as VIT1) has been identified as an interactor of  
132 the activated (phosphorylated) cytoplasmic domain of BRL2<sup>13</sup>, a receptor  
133 kinase of the BRI1 family with a role in vascular development<sup>13,23</sup>. *TTL3*  
134 belongs to a family of 4 genes (from *TTL1* to *TTL4*) in *Arabidopsis*<sup>11,12</sup>. We  
135 confirmed defects in vein formation using a different *ttl3* mutant allele  
136 (Supplementary Fig. 1a), and showed that mutations in *TTL1* and *TTL4*, but not  
137 *TTL2*, also caused venation defects that were markedly enhanced in a triple *ttl1*  
138 *ttl3 ttl4* mutant (from now on referred to as *ttl134*) (Supplementary Fig. 1a).

139 TTL3 has been proposed as an adaptor protein of BRL2 that, through  
140 association with other proteins modulate vein formation<sup>13</sup>. TTL3, as other TTL  
141 proteins from other plant species<sup>11,12</sup>, are characterized by the presence of 6  
142 tetratricopeptide repeats (TPR) and a C-terminal domain with homology to  
143 thioredoxins. An *in silico* structural analysis of TTL3 predicts the presence of an  
144 intrinsically disordered region (IDR) at the N-terminus (Supplementary Fig. 2)  
145 with the rest of the protein forming a horseshoe-shaped structure composed of  
146 multiple helix-turn-helix motifs (Fig. 1a). This structure is consistent with TTL3  
147 being involved in protein-protein interactions and the assembly of multi-protein  
148 complexes<sup>20-22</sup>.

149 A previous report indicated a role for *TTL3* in BR responses<sup>13</sup>, and the  
150 similarity between BRL2 and BRI1 kinase domains (Supplementary Fig. 3)  
151 suggested that TTL3 could also interact with the BRI1 cytoplasmic domain. We  
152 therefore tested the *in vitro* direct interaction of TTL3 with the BRI1 cytoplasmic  
153 region, which includes the juxta-membrane (JM), the kinase domain and the  
154 carboxy-terminal (CT) domain (BRI1cyt) (Fig. 1b). While BRI1cyt was soluble  
155 when fused to an MBP tag (Supplementary Fig. 4), we were unable to produce  
156 full-length TTL3 protein fused to GST despite many attempts (data not shown)  
157 probably due to low stability caused by the IDR<sup>24</sup>. We could however produce  
158 in *E. coli* two different soluble fragments: TTL3 lacking the N-terminus IDR  
159 (TTL3 $\Delta$ N1) and TTL3 containing the TRLX domain (TTL3 $\Delta$ N3) (Fig. 1c;  
160 Supplementary Fig. 4). Using an *in vitro* GST pull-down assay we did not detect  
161 interaction of BRI1cyt with either TTL3 $\Delta$ N1 or TTL3 $\Delta$ N3 (Fig. 1c, d). Because  
162 the activation of BRI1 is dependent on BRI1-ASSOCIATED KINASE 1 (BAK1)  
163 transphosphorylation on specific residues at the JM and CT (Wang et, 2008) we  
164 used a BAK1-independent BRI1 constitutively-active (phosphomimetic) form  
165 BRI1cyt<sup>JMCT9D</sup> in which nine serines and threonines have been substituted by  
166 aspartic acid at the JM and CR domains (Wang et al., 2008) (Fig. 1b). In this  
167 case, BRI1cyt<sup>JMCT9D</sup> was pulled down by TL3 $\Delta$ N1, but not by TTL3 $\Delta$ N3 (Fig. 1c,  
168 d). This indicates that TTL3 predominantly interacts with active BRI1 form that is  
169 independent of BAK1 activation, and that this interaction occurs between the  
170 TPR domains, but not the TRLX domain of TTL3.

171 Next, we investigated this interaction *in vivo* by performing co-  
172 immunoprecipitation (Co-IP) assays after transient expression of tagged full-  
173 length TTL3 and BRI1 in *Nicotiana benthamiana*. After immunoprecipitation of  
174 GFP-TTL3 and free GFP using GFP-Trap beads, we detected a strong specific  
175 interaction between GFP-TTL3 and BRI1-HA (Fig. 1e. Lanes 1 and 2).  
176 Additional Co-IP experiments using a C-terminally GFP tagged TTL3 protein  
177 (TTL3-GFP) co-expressed with BRI1-HA (Supplementary Fig. 5a) and BRI1-  
178 GFP co-expressed with TTL3-HA (Supplementary Fig. 5b) further confirmed the  
179 specificity of TTL3-BRI1 interaction and indicated that the position and tag used  
180 in the Co-IP experiments does not affect their interaction *in planta*.

181 We further used Co-IP assays to map the interaction domains of TTL3 required  
182 for the interaction with BRI1. We performed this analysis *in planta* in order to  
183 determine the possible role of the IDR domain in the interaction, which was not  
184 possible using *in vitro* assays. We generated a series of truncated TTL3  
185 fragments with deletions at the N-terminus (TTL3 $\Delta$ N1, TTL3 $\Delta$ N2, TTL3 $\Delta$ N3)  
186 and at the C-terminus (TTL3 $\Delta$ C1, TTL3 $\Delta$ C2), transcriptionally fused to GFP at  
187 the N-terminus (Fig. 1c) and co-expressed with BRI1-HA in *N. benthamiana*  
188 leaves. Expression analysis of the truncated proteins indicated that all  
189 accumulated at the expected molecular size (Fig. 1e, Input). TTL3 $\Delta$ C1 and  
190 TTL3 $\Delta$ C2 constructs, both lacking the TRLX domain, showed lower  
191 accumulation than the other constructs, suggesting that TRLX is important for  
192 protein stabilization.

193 Three of the five truncated TTL3 proteins, *i.e.* GFP-TTL3 $\Delta$ N1 and GFP-  
194 TTL3 $\Delta$ N2 and GFP-TTL3 $\Delta$ C2 co-immunoprecipitated BRI1-HA with different  
195 efficiency – all having in common TPR3 to TPR6 (Fig. 1c) – indicating that these  
196 domains are essential for the interaction, which is consistent with the *in vitro*  
197 data (Fig. d). In order to better evaluate the interaction of the different TTL  
198 proteins fragments and BRI1, the amount of co-immunoprecipitated BRI1-HA  
199 was normalized relative to the amount of protein input (Fig. 1e). The strongest  
200 interaction occurs with the full-length TTL3 protein, indicating that all domains  
201 contribute to stabilize the interaction with BRI1. A lower but similar interaction  
202 was observed with GFP-TTL3 $\Delta$ N1 and GFP-TTL3 $\Delta$ N2, both containing the  
203 TRLX domain, indicating that this domain is important for a stable interaction  
204 although it is not sufficient to interact with BRI1 *in vitro* or *in vivo* (Fig. 1c, e).  
205 Consistent with this result, removing the TRLX region in GFP-TTL3 $\Delta$ C2 greatly  
206 reduced the interaction between TTL3 and BRI1 (Fig. 1c, d, e).

207 Finally, the interaction between BRI1 and TTL3 was also investigated using  
208 bimolecular fluorescence complementation (BiFC) assays in *N. benthamiana*  
209 leaves, which provide additional information about the subcellular localization of  
210 the interaction. As shown in Fig. 1f, co-expression of TTL3-nYFP with BRI1-  
211 cYFP or BRI1-nYFP with TTL3-cYFP (Supplementary Fig. 5c) reconstituted  
212 functional YFP proteins at the plasma membrane, which confirm the interaction  
213 and is consistent with the plasma membrane localization of BRI1.



214 BAK1, also known as SERK3, and other SERK proteins are transmembrane  
215 kinases that function as BR co-receptors<sup>25</sup>. Similar Co-IP experiments using  
216 TTL3-GFP and BAK1 transiently co-expressed in *N. benthamiana* indicated  
217 that, contrary to BRI1, TTL3 does not associate *in vivo* with BAK1  
218 (Supplementary Fig. 5d). This result was verified by BiFC assays in *N.*  
219 *benthamiana* leaves. Confocal microscopic analyses revealed that co-  
220 expression TTL3-nYFP with BAK1-cYFP (Fig. 1f) and also BAK1-nYFP with  
221 TTL3-cYFP (Supplementary Fig. 5c) did not reconstitute functional YFP  
222 proteins. To confirm that BiFC BAK1 constructs were functional, we performed  
223 BiFC between BRI1 and BAK1 resulting in positive signals (Fig. 1f;  
224 Supplementary Fig. 5c)

### 225 ***tfl* mutants show defects in BR responses**

226 The interaction of TTL3 with BRI1 supports a role of TTL3 in BR signaling.  
227 Quantitative RT-PCR analyses indicate that the expression of *TTL1*, *TTL3*, and  
228 *TTL4* is induced by BR<sup>14</sup>, which is also supported by available transcriptomic  
229 data (Supplementary Fig 6a). This up-regulation of the *TTL* genes in response  
230 to BR was confirmed at cellular level by analyzing transgenic plants transformed  
231 with the reporter  $\beta$ -glucuronidase gene driven by each of the *TTL* promoters  
232 (Supplementary Fig 6b).

233 Next, we analyzed the sensitivity to exogenous epibrassinolide (eBL) by  
234 measuring root growth in the presence or absence of 100 nM eBL in single *tfl*  
235 mutants, the triple *tfl134* mutant and *bak1-4*, a well-established mutant affected  
236 in BR responses<sup>26-29</sup>. Single *tfl* mutants, the *tfl134* mutant, and the *bak1-4*  
237 mutant showed a similar root growth to Col-0 in control conditions (Fig. 2a;  
238 Supplementary Fig. 7a). However, *bak1-4*, *tfl1*, *tfl3*, and *tfl4* show increased root  
239 length than Col-0 control or *tfl2* in the presence of eBL (Fig. 2a; Supplementary  
240 Fig. 7b). This decreased sensitivity to eBL of single *tfl* mutants was strongly  
241 enhanced in the *tfl134* (Fig. 2a; Supplementary Fig 7b). Root growth sensitivity  
242 to eBL of the *tfl134* mutant was then compared, in addition to *bak1-4*, to well  
243 characterized genotypes affected in BR responses such as *serk1-1* and the  
244 double *serk1-1 bak1-4* mutant<sup>26</sup>. In control conditions, all genotypes grew  
245 similarly, with the exception of *serk1-1 bak1-4*, which showed reduced root



246 growth (Fig. 2b; Supplementary Fig 7c) as previously reported<sup>30,31</sup>. In the  
247 presence of 100 nM eBL, the root growth reduction of the Col-0 control was  
248 significantly higher than for the rest of the genotypes, including *tll134* (Fig. 2b;  
249 Supplementary Fig 7d), while *serk1-1 bak1-4* double mutant was almost  
250 insensitive to eBL, as it showed a similar root growth in control and eBL-  
251 supplemented media (Fig. 2b; Supplementary Fig 7c, d).

252 Hypocotyl elongation in the dark is dependent on active BR signaling<sup>32</sup>. We  
253 analyzed hypocotyl elongation in the dark of *tll3*, *tll134* and *bak1-4* as a read-  
254 out of defective BR signaling<sup>33</sup>. As previously reported, *bak1-4* showed a  
255 reduction in hypocotyl elongation relative to Col-0<sup>34,35</sup> (Fig. 2c; Supplementary  
256 Fig 8). Similar to *bak1-4*, *tll3* and *tll134* mutants presented shorter hypocotyls  
257 than Col-0 (Fig. 2c; Supplementary Fig 8).

258 To investigate the contribution of *TTL* genes to BR responses at the molecular  
259 level, we first studied the expression of the BR-regulated genes *CPD1* and  
260 *DWF4* in Col-0, *bak1-4*, and the triple *tll134* mutants. As shown in Fig. 2d,  
261 *DWF4* and *CDP1* expression was around two-fold higher in *tll134* and *bak1-4*  
262 compared to the Col-0 control. This increased *CPD1* and *DWF4* expression has  
263 been reported for BR signaling mutants such as *bri1-5*<sup>36</sup>, *bri1-301*<sup>26</sup> and *bik1*  
264<sup>37</sup>, and is caused by a lack of feedback regulation in the expression of these  
265 biosynthetic genes<sup>38-40</sup>. Second, we investigated the phosphorylation status of  
266 BES1 in Col-0 and the *tll134* mutant in response to eBL. Because the BR  
267 biosynthetic genes *DWF4* and *CDP1* are induced in *tll134*, and to fully capture  
268 the BR signaling capacity of *tll134*, we first pretreated the seedlings with BR  
269 biosynthesis inhibitor brassinazole (BRZ). Without BR treatment, a strong  
270 phosphorylated BES1 (pBES1) band and a weak unphosphorylated (BES1)  
271 band are present in Col-0 and *tll134* (Fig. 2e). As expected, BR treatment  
272 caused an increase of dephosphorylated BES1 in Col-0 due to activation of the  
273 pathway. However, eBL caused little dephosphorylation of pBES1 in *tll134*  
274 seedlings (Fig. 2e), confirming a defective BR signaling in *tll134*.

### 275 **BRs regulate the cytoplasmic/plasma membrane localization of TTL3**

276 To further explore how TTL3 functions in BR signaling we analyzed its

277 subcellular localization. Although the BiFC interaction of TTL3 with BRI1  
278 suggests a plasma membrane localization of TTL3, expression of a C-terminal  
279 GFP-tagged TTL3 in *N. benthamiana* indicated a predominant cytoplasmic  
280 localization in basal conditions (Supplementary Fig. 9a). However, plasmolyzed  
281 cells show the presence of GFP-TTL3 in Hechtian strands, indicative that TTL3  
282 also associated with the plasma membrane (Supplementary Fig. 9b). In order to  
283 gain further insight into TTL3 localization, a genomic fragment including a 1.7  
284 kb *TTL3* promoter region upstream of the start codon was transcriptionally  
285 fused to GFP to generate the *TTL3p::TTL3g-GFP* construct and transformed  
286 into *ttl3* and *ttl134* mutants using *A. tumefaciens*. After confocal analysis of a  
287 large number of independent stable transgenic lines, we selected two  
288 homozygous lines, one in *ttl3* background (hereafter referred to as *TTL3-GFP*  
289 *1.2*) and another in *ttl134* background (*TTL3-GFP 2.4*), which presented  
290 noticeable fluorescence signals. Venation defects of *ttl3* and *ttl134* were  
291 restored to levels similar to Col-0 in *TTL3-GFP 1.2* and *TTL3-GFP 2.4*,  
292 (Supplementary Fig.1b). Furthermore, root growth of *TTL3-GFP 1.2*  
293 (Supplementary Fig.10a, b) and *TTL3-GFP 2.4* (Fig. 3a, b, c) were restored to  
294 wild type levels in the presence of eBL, indicative of a functional TTL3-GFP  
295 protein.

296 We then used *TTL3-GFP 2.4* (which showed a stronger fluorescence signal  
297 than *1.2*) to analyze the cellular and subcellular localization of TTL3.  
298 Examination under a stereomicroscope indicated that TTL3-GFP accumulated  
299 mainly at the root tip and the hypocotyl of Arabidopsis seedlings (Fig. 3d). This  
300 accumulation coincides with cells that undergo strong BR signaling leading to  
301 active growth, and highly resembles the accumulation pattern of BRI1-GFP<sup>41-43</sup>.  
302 Cellular analysis using confocal microscopy was performed in 3-day-old roots,  
303 simultaneously localizing TTL3-GFP with the FM4-64, a lipophilic red dye that  
304 labels the plasma membrane and tracks plasma membrane-derived endosomes  
305<sup>44</sup>. In Col-0 control roots, no GFP signal was detected (Fig. 3e), while analysis  
306 of *TTL3-GFP 2.4* revealed the presence of TTL3-GFP in all cell files of the root  
307 apical meristem (Fig. 3f). Further up, in the meristematic region, TTL3-GFP  
308 showed a predominant localization in the outer cell layers (epidermis and  
309 cortex) (Fig. 3f).

310 At the subcellular level, TTL3-GFP mostly showed a cytoplasmic localization in  
311 the root meristematic cells (Fig. 3g). However, we sometimes observed  
312 seedlings that, in addition to the cytoplasmic GFP localization, showed GFP  
313 signal at the plasma membrane. Therefore, we quantified the plasma  
314 membrane localization of TTL3-GFP (see Figure legend and Methods section  
315 for details) in control conditions and found that in ~30% of the seedlings some  
316 cells showed plasma membrane localization of TTL3-GFP (Fig. 3j).

317 Interestingly, treatment with 1  $\mu$ M eBL, a concentration previously used to  
318 analyze short-term BKI1 dynamics<sup>45</sup>, increased the amount of TTL3-GFP  
319 protein (Supplementary Fig. 11) and caused a relocalization of TTL3-GFP from  
320 the cytoplasm to the plasma membrane (Fig. 3h, j; Supplementary Fig. 12a, b).  
321 A detailed quantification indicated that eBL treatment cause a drastic increase  
322 in the amount of seedlings and the number of cells per seedling with plasma  
323 membrane-localized TTL3-GFP (Fig. 3j). eBL treatment also caused the  
324 appearance of GFP-labeled intracellular structures (Fig. 3h), although these  
325 intracellular TTL3-GFP structures do not colocalize with FM4-64  
326 (Supplementary Fig. 12), discarding the possibility that they may correspond to  
327 plasma membrane-derived endosomes, and thus their identity remains elusive.

328 Consistent with the possibility that the plasma membrane localization of TTL3-  
329 GFP in seedlings grown in control medium was caused by endogenous BRs,  
330 the percentage of seedlings with plasma membrane signal decreased from  
331 ~30% to ~5% after treatment with BRZ (Fig. 3k). Further treatment of these  
332 seedlings with eBL reverted this effect and increased the plasma membrane  
333 localization of TTL3-GFP (Fig. 3k).

### 334 **TTL3 associates with the BR signaling components BSK1, BSU1 and BIN2** 335 **and directly interacts with BSU1**

336 Our previous analyses indicate that TTL3 is involved in BR signaling probably  
337 through the scaffolding of BR signaling components. Using Co-IP and BiFC in  
338 *N. benthamiana* we investigated the possible association of TTL3 with other  
339 core components of BR signaling. TTL3 strongly associates with BSK1 in both  
340 Co-IP and BiFC assays (Fig. 4a, b). BiFC between TTL3 and BSK1 was also  
341 obtained when we exchanged nYFP and cYFP tags (Supplementary Fig. 13)

342 and consistent with the plasma membrane localization of BSK1, the BiFC signal  
343 for BSK1-TTL3 was observed at the plasma membrane. TTL3 also associates  
344 with BSU1 and BIN2 in both Co-IP and BiFC assays (Fig. 4b, c, d). Although  
345 BSU1 and BIN2 present a dual nuclear and cytoplasmic localization<sup>46,47</sup>, BiFC  
346 signals were only observed in the cytoplasm for both TTL3-BSU1 and TTL3-  
347 BIN2, which is consistent with the lack of TTL3 protein in the nucleus (Fig. 4b).  
348 A cytoplasmic BiFC signal was also obtained when YFP halves were  
349 interchanged among TTL3-BSU1 and TTL3-BIN2 (Supplementary Fig. 13). Two  
350 BSU1 bands with different mobility in SDS–polyacrylamide gel electrophoresis  
351 were obtained after expression in *N. benthamiana*. This apparent difference in  
352 size is likely caused by a different phosphorylation status (Fig. 4c), and  
353 interestingly, TTL3 mainly associated with the faster mobility BSU1 band (Fig.  
354 4c). Reducing endogenous BRs by BRZ treatment decreased the relative  
355 amount of the lower band (Supplementary Fig. 14), suggesting that this band  
356 corresponds to the active (dephosphorylated) BSU1 form.

357 Next, we investigated possible direct interactions between TTL3 and the  
358 cytoplasmic BR signaling components BSU1 and BIN2, using yeast two-hybrid  
359 assays. Using a full-length TTL3 protein, we did not find interactions with any of  
360 the investigated BR components, despite obtaining previously positive reported  
361 interactions such as BIN2 with BSU1 and with BES1 (Fig. 4e). Western blot  
362 analysis indicated that BD-TTL3 fusion protein was not detected  
363 (Supplementary Fig. 15), similar to what previously occurred in *E. coli*.  
364 Therefore, we generated additional yeast two-hybrid constructs using the  
365 TTL3 $\Delta$ N1 and TTL3 $\Delta$ N2 fragments (Fig. 1c). As shown in Fig. 4e, TTL3 $\Delta$ N1 but  
366 not TTL3 $\Delta$ N2 interacted with BSU1, indicating that the six TPR domains are  
367 required for the interaction. In contrast to BSU1, BIN2 did not interact with  
368 TTL3 $\Delta$ N1 (Fig. 4e), despite the positive interactions of BIN2 with BSU1 or BES1  
369 were detected (Fig. 4e). These data indicate that the six TPR of TTL3 are  
370 required for the *in vitro* interaction with BSU1 while *in vivo* data suggests that  
371 TTL3 preferentially associates with the active (phosphorylated) BSU1.

372

373 **TTL3 interacts with the transcription factors BZR1 and BES1 and affects**  
374 **BZR1 cytoplasmic/nuclear localization**

375

376 In the absence of BRs, BIN2 phosphorylates and inactivates BZR1 and BES1,  
377 which are the two major transcription factors mediating BR-induced  
378 transcriptional changes<sup>5</sup>. TTL3 associates with BZR1 in Co-IP experiments in  
379 *N. benthamiana* (Fig. 5a) and in *Arabidopsis* mesophyll protoplasts (Fig. 5b).  
380 Phosphorylated and dephosphorylated BZR1 and BES1 proteins show a  
381 marked difference in mobility in SDS–PAGE upon expression in *N.*  
382 *benthamiana*, (Fig. 5a, b, Supplementary Fig. 16a, b) or in *Arabidopsis*  
383 protoplasts (Fig. 5b)<sup>48,49</sup>. Interestingly, only the phosphorylated BZR1 (pBZR1)  
384 was co-immunoprecipitated with TTL3 (Fig. 5b, Supplementary Fig. 16a)  
385 indicating a preferential association of TTL3 with pBZR1. Similarly, TTL3 only  
386 co-immunoprecipitated the phosphorylated BES1 (pBES1) (Supplementary Fig.  
387 16b). BiFC assays further confirmed the *in vivo* association of BZR1 and BES1  
388 with TTL3 (Fig. 4c, Supplementary Fig. 13). While the BiFC signal of TTL3 with  
389 plasma membrane BR components results in a smooth YFP fluorescence signal  
390 at the plasma membrane (Fig. 1f, Supplementary Fig. 5c, Fig. 4b,  
391 Supplementary Fig. 13), the BiFC signal of TTL3 with the cytoplasmic  
392 components appear punctated (Fig. 4b, Supplementary Fig. 13, Fig. 5c). A  
393 similar punctate BiFC signal has been previously reported for BZR1 with BRZ-  
394 SENSITIVE-SHORT HYPOCOTYL 1 (BSS1)<sup>50</sup> or BES1 with DOMINANT  
395 SUPPRESSOR OF KAR 2 (DSK2)<sup>7</sup>, although its significance remains  
396 unknown.

397 Next we performed a yeast two-hybrid assay between TTL3 and the  
398 transcription factor BZR1. As expected (see Fig. 4e), a full-length TTL3 protein  
399 did not interact with BZR1, despite detecting the previously described positive  
400 interaction between BZR1 and BIN2<sup>51</sup> (Fig. 5d). However we could detect the  
401 direct interaction between TTL3ΔN1 (Fig. 1c) and BZR1 (Fig. 5d) and contrary  
402 to BSU1, TTL3ΔN2 (Fig. 1c) also interacted with BZR1 (Fig. 5d) indicating that  
403 the TPR3 to TPR6 region is sufficient for the TTL3-BZR1 interaction (Fig. 5d).

404 We next analyzed the effect of TTL3 on the nuclear and cytoplasmic  
405 localization of BZR1-GFP. As previously reported, BZR1-GFP in *N.*

406 *benthamiana* is mainly localized in the nucleus (Fig. 5e), while co-expression of  
407 BIN2 together with BZR1-GFP promotes its phosphorylation and its cytoplasmic  
408 retention (Fig. 5e)<sup>52</sup>. Co-expressing TTL3-HA with BZR1-GFP and BIN2-HA  
409 suppressed the cytoplasmic retention of BZR1-GFP promoted by BIN2 (Fig.  
410 5e). We also used Arabidopsis plants expressing the salicylate hydroxylase  
411 (*NahG*) gene, as these plants are efficiently transiently transformed using *A.*  
412 *tumefaciens*<sup>53</sup>. Similar to *N. benthamiana*, coexpressing BIN2-HA together with  
413 BZR1-GFP increased its cytoplasmic accumulation, which was further abolished  
414 by TTL3-HA (Fig. 5f). This BZR1 nuclear/cytoplasmic localization correlates with  
415 the dephosphorylation status of BZR1 (Fig. 5g), indicating that TTL3 negatively  
416 regulates BIN2 phosphorylation of BZR1 and regulates its activity.

#### 417 **TTL3 acts as a scaffold by enhancing BZR1-BSK1 interaction**

418 Next, we investigated a possible scaffold function of TTL3 in BR signaling and  
419 investigated whether TTL3 affects the association of the plasma membrane-  
420 localized BSK1 with cytoplasmic components of BR signaling using BiFC. As  
421 shown in Fig. 6a, strong BiFC signal was obtained for BSK1 with BRI1, BSU1  
422 and BIN2 while a weak signal was obtained for BSK1 with BZR1. The strong  
423 BiFC signal detected for BSK1 with BRI1 and with BSU1 is expected since this  
424 BR signaling components direct interact with BSK1<sup>52</sup>. BIN2, although mainly  
425 localizes at the nucleus and cytosol, also localizes at the plasma membrane<sup>47</sup>  
426 and direct interaction with several plasma membrane-localized BSKs in yeast  
427 two-hybrid assays was previously reported<sup>54</sup>. The weak BSK1-BZR1  
428 association is consistent with a previous proteomic study that identified BSK1  
429 as an interactor of BZR1<sup>55</sup>. Importantly, when we co-expressed TTL3-HA  
430 together with BSK1-nYFP and BZR1-cYFP the BiFC signal was strongly  
431 enhanced (Fig. 6b) indicating that TTL3 increases the association between  
432 BSK1 and BZR1 at the plasma membrane. Further Co-IP experiments also  
433 showed that the amount of BSK1-HA that was immunoprecipitated with BZR1-  
434 GFP was also enhanced upon co-expression of TTL3-mCherry (Fig. 6c). This  
435 result strongly supports a scaffolding role of TTL3 that would help bringing a  
436 cytoplasmic component such BZR1 with BR signaling components at the  
437 plasma membrane such BSK1.



## 438 DISCUSSION

439 Our study reveals that plant-specific TTL proteins function as positive regulators  
440 of BR signaling. The expression of *TTL* genes is induced by BRs and TTL3  
441 shows its highest expression at the root elongation zone and at the hypocotyl,  
442 which are areas of high BR activity<sup>32,56</sup>. A functional TTL3-GFP is mainly  
443 localized in the cytoplasm but also shows plasma membrane localization  
444 dependent on BR concentration. The *ttl134* mutant is hyposensitive to BR in  
445 root growth assays, shows reduced hypocotyl elongation under darkness, has  
446 increased expression of BR marker genes *CPD1* and *DWF4* in normal growth  
447 conditions, and exhibits reduced BES1 dephosphorylation levels after BR  
448 treatment. Furthermore, co-expression of TTL3 together with BZR1 and BIN2  
449 abolishes the BIN2-directed BZR1 cytoplasmic retention in *Arabidopsis* and *N.*  
450 *benthamiana*. Thus, TTL3 negatively regulates BIN2-phosphorylation and  
451 subcellular localization of BZR1<sup>48,49,52,57</sup>.

452 TTL3 protein associates *in vivo* with all core BR signaling components, with the  
453 exception of BAK1, and shows direct interaction with BRI1, BSU1 and BZR1.  
454 TTL3 contains several defined domains: an IDR at the N-terminus followed by 6  
455 TPR domains involved in protein-protein interactions and assembly of  
456 multiprotein complexes, and a region with homology to thioredoxins at the C-  
457 terminus. With the exception of the IDR, most of the protein is predicted to form  
458 helix-turn-helix. Mapping the interaction domains of TTL3 with BRI1 indicates  
459 that the last four TPRs are essential for this interaction, the TRLX domain is  
460 important for protein stabilization, and that both TRLX and the IDR contribute to  
461 strengthen the interaction. The presence of an IDR in TTL proteins can provide  
462 additional advantages in their scaffolding and regulatory function. It was  
463 previously reported that IDRs allow their interaction with a large number of  
464 interaction partners due to their ability to adopt different conformations thus  
465 allowing the assembly of multiple proteins<sup>58</sup>. We also found that interaction of  
466 TTL3 with BSU1 requires all 6 TPRs while only the last four TPR domains are  
467 required for the interaction with BZR1.

468 The BR-related phenotypes, together with the structure of TTL3 and the  
469 interactions here described, led us to propose a model in which TTL3 (and



470 probably other TTLs) functions as a scaffold for BR signaling components (Fig.  
471 7). In the absence of BR, TTL3 is localized in the cytoplasm where it forms a  
472 complex with phosphorylated BZR1 and BIN2. In these conditions BZR1 is  
473 continuously phosphorylated by BIN2, keeping it inactive. Upon BR perception,  
474 the activation of BRI1 by BAK1 causes the re-localization of TTL3-GFP to the  
475 plasma membrane, which in turn, brings the TTL3-associated BR cytoplasmic  
476 components to the plasma membrane causing the assembly of the pathway  
477 components (Fig. 7). The small amount of plasma membrane-localized TTL3 in  
478 control conditions probably reflects basal BRI1 signaling induced by  
479 endogenous BR, as demonstrated by the reduced plasma membrane  
480 localization of TTL3 after BRZ treatment (Fig. 3k). The TTL3-dependent  
481 assembly of cytoplasmic BR components at the plasma membrane would then  
482 promote the inactivation of BIN2 by the BSU1 phosphatase<sup>52</sup>. Inactivation of  
483 BIN2 by active BSU1 (which is preferentially bound by TTL3) will, in turn, cause  
484 the dephosphorylation of BZR1 by PP2A. Because dephosphorylated BZR1 do  
485 not interact with TTL3, it will be released from the complex and subsequent  
486 activation of BR dependent genes in the nucleus will take place (Fig. 7).

487 Although in current models of BR signaling phosphorylation/de-phosphorylation  
488 of transcription factors take place exclusively in the cytoplasm and the nucleus  
489<sup>5,59</sup>, a survey of the literature provides evidence that the plasma membrane  
490 could be an active site of BR signaling, from perception of the hormone to de-  
491 phosphorylation of the transcription factors: (1) a significant amount of  
492 phosphorylated BZR1 located at the plasma membrane is greatly reduced upon  
493 BR treatment<sup>48</sup>; (2) several BSKs that are plasma membrane-bound interact  
494 with BIN2, suggesting that dephosphorylation of BZR1 and BIN2 is also taking  
495 place at the plasma membrane<sup>46,54</sup>; (3) BSK1 has been identified as an  
496 interactor of BZR1 using non-targeted proteomics, which led the authors to  
497 propose that BR-signaling components exist in the plasma membrane as a  
498 multi-protein complex<sup>55</sup>. We show that BZR1 and BSK1 weakly interact at the  
499 plasma membrane and that coexpression of TTL3 greatly increases this  
500 association, supporting a role of the plasma membrane in BR signaling.

501 BR signaling mediated by TTL3 resembles that of Wnt/ $\beta$  catenin signaling which

502 controls many biological processes in metazoans, including cell fate  
503 determination, cell proliferation, and stem cell maintenance<sup>60-62</sup>. In both cases,  
504 extracellular ligands are perceived by transmembrane receptors and the signal  
505 is transduced through phosphorylation events where GSK3 type kinases  
506 phosphorylate effector proteins (either  $\beta$ -catenin in Wnt/ $\beta$  catenin signaling or  
507 BZR1/BES1 in BR signaling), resulting in their stabilization or degradation<sup>5,60-62</sup>.  
508 Interestingly, an essential component of this so-called destruction complex  
509 involves the central scaffold protein Axin1, which, similar to TTL3, interacts with  
510 the core signaling components. In resting conditions GSK3 phosphorylates and  
511 degrades  $\beta$ -catenin, although upon Wnt perception the Axin complex is  
512 relocated from the cytoplasm to the plasma membrane, where it suppresses  
513 ubiquitination of  $\beta$ -catenin, leading to saturation of complex by accumulation of  
514 phospho- $\beta$ -catenin. As a result, newly synthesized  $\beta$ -catenin can accumulate in  
515 the cytosol and translocate to the nucleus, where it promotes transcription<sup>61,62</sup>.

516 The basic function of scaffolding proteins is the assembly of signaling  
517 components to enhance the efficiency of the signaling cascade by increasing  
518 their local concentrations as well as the localization of the signaling reaction to  
519 a specific area of the cell. This could be particularly important in BR signal  
520 components because some of these proteins are expressed at vanishingly low  
521 levels like BSU1 and BIN2<sup>63,64</sup>. This scaffolding function of TTL proteins might  
522 also have a role in enhancing signaling specificity by preventing spurious  
523 interactions by BR signaling components and generating BR specificity. This is  
524 important because some components of the BR pathway have been reported to  
525 participate in signaling pathways different from the BR one. For example, BAK1  
526 and related SERK co-receptors are involved in numerous signaling pathways<sup>25</sup>  
527 in addition to its role in BR signaling, and BIN2 shows multiple targets that result  
528 in different signaling outcomes<sup>65,66</sup>. Another example is BSK1, which was  
529 originally identified as a BR signaling component by proteomic studies<sup>67</sup> but  
530 was later found regulate also immune signaling<sup>68</sup>. Because TTL1, TTL3, and  
531 TTL4 genes were previously reported to play a role in abiotic stress tolerance  
532 and there is an increasing evidence for the co-ordination of BR-promoted  
533 growth and abiotic stress responses<sup>7-9</sup>, we cannot exclude that function of  
534 TTL3 (and probably other TTLs) as a scaffold of BR signaling components

535 contribute to this cross-talk.

536 Our work uncovers an essential component of BR signaling and fills a gap in  
537 our understanding of signaling cascades from the plasma membrane to the  
538 nucleus in plant cells. The characterization of other possible scaffold proteins,  
539 with a function equivalent to TTLs, will be key to understand how signaling  
540 components are assembled in other signaling cascades to ensure the timely  
541 signal transduction upon perception of extracellular signals.

542

543

544 **FIGURE LEGENDS**

545

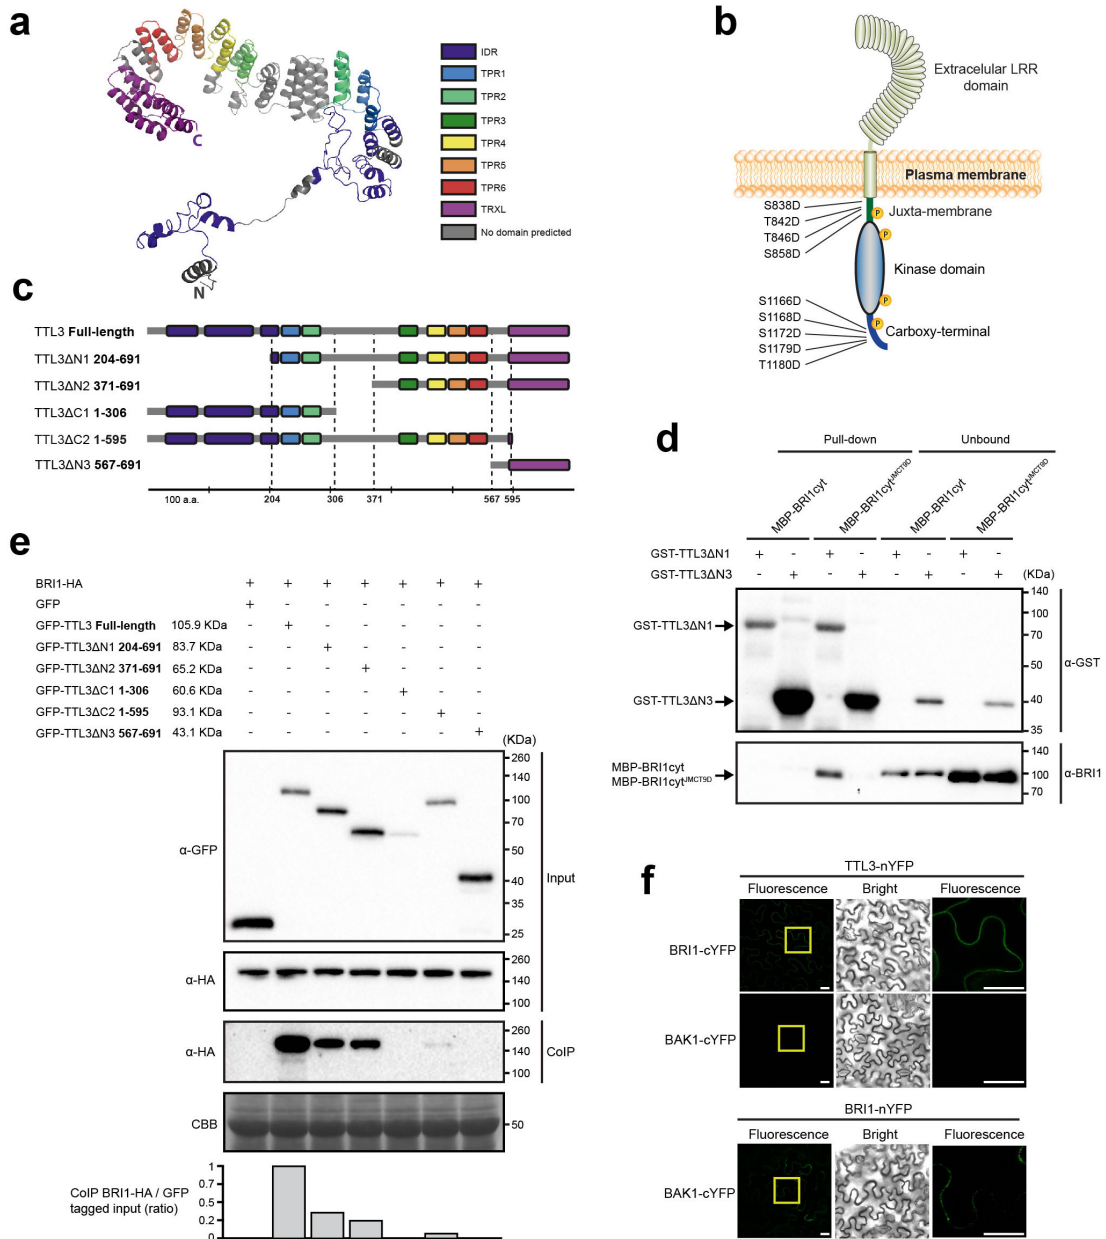

546

547 **Figure 1. TTL3 interacts with BRI1 *in vivo* and *in vitro*.**

548

549 **a** The structural model of the TTL3 protein predicted *in silico* using I-TASSER  
 550 server<sup>69</sup> and processed by PyMOL (Schrödinger). IDR, interstitially disorder  
 551 region; TPR, tetratricopeptide repeats; and TPRX thioredoxin-like domain with  
 552 homology to thioredoxins; N; N-terminus; C; C-terminus.

553

554 **b** Schematic representation of BRI1 protein and the nine Serine/Threonine  
555 residues of the juxta-membrane and carboxyl-terminal domains that were  
556 substituted by Aspartic Acid in the BAK1-independent BRI1-constitutive  
557 (phosphomimetic) active form BRI1cyt<sup>JMCT9D</sup> 70.  
558

559 **c** Schematic representations of full-length and different truncated versions of  
560 TTL3 protein. Numbers indicates first and last amino acids of TTL3 truncated  
561 proteins. IDR, interstitially disorder region; TPR, tetratricopeptide repeats;  
562 TPRX, thioredoxin-like domain with homology to thioredoxins; domains and  
563 protein fragments interspacing the conserved domains are represented with the  
564 same color code as in **a**.  
565

566 **d** TTL3ΔN1 interacts with BRI1cyt<sup>JMCT9D</sup> *in vitro*, as shown by GST-pull down  
567 assay. GST-TTL3ΔN1 and GST-TTL3ΔN3 were detected with anti-GST  
568 antibody. MBP-BRI1cyt and MBP-BRI1cyt<sup>JMCT9D</sup> were detected using specific  
569 anti-BRI1 antibodies 71. Pull-down reflects 20% of the total pulled-down  
570 proteins. Unbound reflects 1% of the total unbound fraction.  
571

572 **e** BRI1-HA co-immunoprecipitates with GFP-TTL3 full length and GFP-TTL3  
573 truncated versions ΔN1, ΔN2 and ΔC1. Numbers indicate first and last amino  
574 acids of TTL3 truncated proteins. BRI1-HA was transiently co-expressed in *N.*  
575 *benthamiana* with GFP-TTL3 full length and truncated versions and GFP  
576 tagged protein was immunoprecipitated using anti-GFP Trap beads. Total  
577 (input), immunoprecipitated (IP) and Co-Immunoprecipitated (CoIP) proteins  
578 were analyzed by western blotting. Equal loading was confirmed by Coomassie  
579 blue staining (CBB) of input samples. GFP and HA tagged proteins were  
580 detected with anti-GFP and anti-HA antibody, respectively.  
581

582 **f** Bimolecular fluorescent complementation (BiFC) confirms the association of  
583 TTL3 with BRI1 but not with BAK1. Leaves of *N. benthamiana* were infiltrated  
584 with the *Agrobacterium* strains harboring constructs to express TTL3 and BRI1  
585 proteins fused to the N-terminus of the YFP and, BRI1 and BAK1 proteins fused  
586 to the C-terminus of the YFP. Using the same settings in the confocal  
587 microscope, YFP fluorescence is observed when TTL3-nYFP is co-expressed

588 with BRI1-cYFP, but no YFP fluorescence is detected when TTL3-nYFP is co-  
 589 expressed with BAK1-cYFP. A weak YFP fluorescence is observed when BRI1-  
 590 nYFP is co-expressed with BAK1-cYFP. From left to right columns, images  
 591 show BiFC YFP fluorescence in green, bright field, and 4× magnification of  
 592 BiFC YFP fluorescence of the region delimited by the yellow square. Scale bars  
 593 represent 20 μm. All experiments were repeated at least three times with similar  
 594 results.  
 595

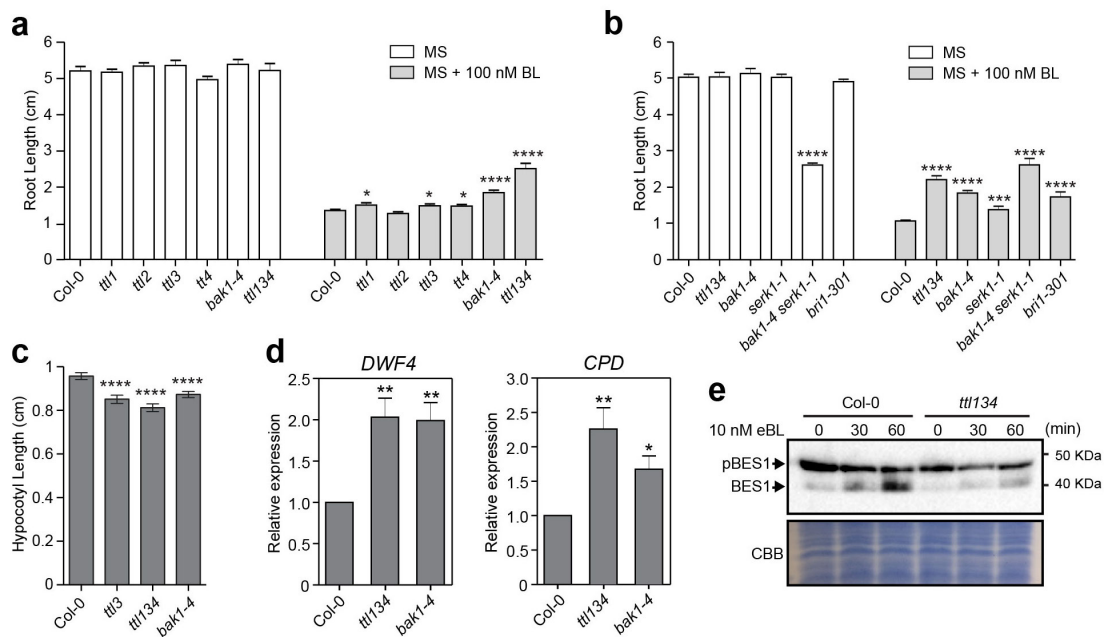

596  
 597 **Figure 2. *TLL1*, *TLL3* and *TLL4* genes play a positive role in BR signaling**  
 598 **pathway.**

599  
 600 **a** *ttl1*, *ttl3*, *ttl4* and *ttl134* show root growth hyposensitivity to BR. Statistical  
 601 analysis of root length measurements of Col-0, *ttl*, and *bak1-4* mutants in  
 602 control conditions (MS) and in response to BL. Seedlings were grown in long  
 603 days for 4 days in half-strength MS agar solidified medium and then transferred  
 604 to half-strength MS agar solidified medium (MS) or half-strength MS agar  
 605 solidified medium supplemented with 100 nM of Brassinolide (MS + 100 nM  
 606 eBL) and root length was measure 6 days later. Asterisks indicate statistical  
 607 differences between mutant vs Col-0 determined by the unpaired *t*-test (\*  $P \leq$   
 608 0.05, \*\*  $P \leq 0.01$ , \*\*\*  $P \leq 0.001$  \*\*\*\*  $P \leq 0.0001$ ). Data represent mean values,

609 error bars are SEM,  $n \geq 35$  seedlings per experiment. The experiment was  
610 repeated three times with similar results.

611

612 **b.** Root length responses to eBL of wild-type Col-0, *ttl134* and BR perception  
613 mutants. Seedlings were grown and root length was analyzed as described in **a**.  
614 Asterisks indicate statistical differences between mutant vs Col-0 as determined  
615 by the unpaired *t*-test (\*\* $P \leq 0.001$  \*\*\*\*  $P \leq 0.0001$ ). Data represent mean  
616 values, error bars are SEM,  $n=30$  seedlings per experiment. The experiment  
617 was repeated three times with similar results.

618

619 **c** Defective hypocotyl elongation in *ttl* mutants. Col-0, *ttl3*, *ttl134* and *bak1-4*  
620 seedlings were grown for 4 days in long-day photoperiod in half-strength MS  
621 agar solidified medium. Seedlings with the same size were then placed in the  
622 dark and hypocotyl elongation was measure 3 days later. Asterisks indicate  
623 statistically difference significances between Col-0 vs the indicated genotype as  
624 determined by the unpaired *t*-test (\*\*\*\*  $P \leq 0.0001$ ), values are mean, error bars  
625 are SEM,  $n = 80$  seedlings per experiment. The experiment was repeated twice  
626 with similar results.

627

628 **d** BR-responsive genes *DWF4* and *CPD* show induced expression in *ttl134* and  
629 *bak1-4* relative to Col-0 seedlings. Seeds were germinated in half-strength MS  
630 agar solidified medium and grown vertically in long-day photoperiod conditions.  
631 5-day-old seedlings were transferred to half-strength MS liquid medium and  
632 after 5 days of acclimation, relative expression level of *DWF4* and *CPD* was  
633 measured by quantitative reverse transcriptase PCR (qPCR). The expression of  
634 *DWF4* and *CPD* was first normalized to the expression of *ACTIN2* gene and  
635 represented relative to the expression of Col-0. The data are shown as mean  $\pm$   
636 SEM from at least three independent biological replicates. Asterisks indicated  
637 statistically significant differences between the indicated genotype vs Col-0 as  
638 determined by the unpaired *t*-test (\*  $P \leq 0.05$ , \*\*  $P \leq 0.01$ ). The experiment was  
639 repeated three times with similar results.

640

641 **e** Phosphorylation status of BES1 in response to exogenous applied BR in  
642 Arabidopsis Col-0 and *ttl134*. Ten-day-old seedlings pre-treated for 3 days with



643 the BR biosynthetic inhibitor brassinazole (BRZ) to deplete the endogenous  
 644 pool of BRs were submitted to 10 nM eBL treatment for 0, 30 and 60 minutes.  
 645 Total proteins were analyzed by an immunoblotting assay with a specific anti-  
 646 BES1 antibody <sup>72</sup>. The upper band corresponds to phosphorylated BES1  
 647 (pBES1) and the lower one to dephosphorylated BES1 (BES1). The experiment  
 648 was repeated two times with similar results.  
 649

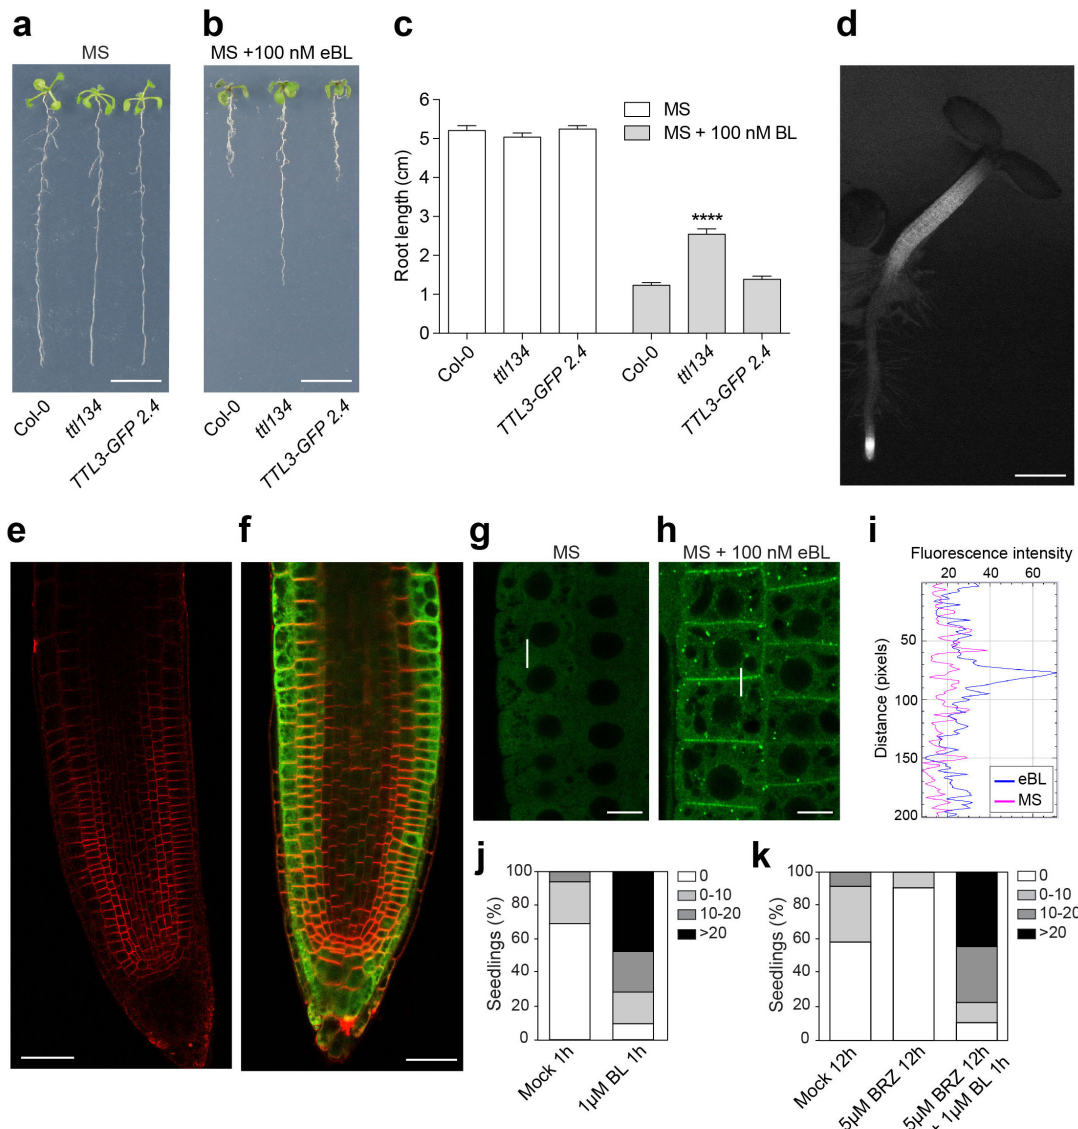

650  
 651 **Figure 3. BRs regulate the cytoplasmic/plasma membrane localization of**  
 652 **TTL3**

653  
 654 **a-c** The root growth responses to eBL of the *ttl134* triple mutant are  
 655 complemented in the *TTL3-GFP 2.4*. Seedlings were grown for 4 days in half-

656 strength MS agar solidified medium and then transferred to half-strength MS  
657 agar solidified medium (**a**) or half-strength MS agar solidified medium  
658 supplemented with 100 nM of Brassinolide (**b**). **a** Representative picture of  
659 seedlings 6 days after treatment. Scale bar represents 1 cm. **c** Statistical  
660 analysis of root length of Col-0, *ttl134* and the complementation line *TTL3-GFP*  
661 2.4. Asterisks indicate statistically significant differences between the indicated  
662 genotype vs Col-0 as determined by the unpaired *t*-test (\*\*\*\*  $P \leq 0.0001$ ). Data  
663 represent mean values, error bars are SEM,  $n=30$  seedlings per experiment.  
664 The experiment was repeated three times with similar results.  
665  
666 **d** Expression pattern of *TTL3-GFP* in 3-day-old *TTL3-GFP* 2.4 Arabidopsis  
667 seedlings. Image was captured using conventional wide field fluorescence  
668 microscopy with a GFP filter. Scale bar represents 500  $\mu\text{m}$ .  
669  
670 **e-f** Longitudinal median section of root tips of a 3-day-old Col-0 (**e**) and *TTL3-*  
671 *GFP* 2.4 as observed by laser scanning confocal microscopy (**f**). Images show a  
672 merge of green channel showing *TTL3-GFP* expression and red channel  
673 showing plasma membrane stained with FM4-64. Scale bar represents 20  $\mu\text{m}$ .  
674  
675 **g-i** Confocal images showing localization of *TTL3-GFP* in epidermal cells from  
676 root meristematic zone in 4-day-old Arabidopsis *TTL3-GFP* 2.4 in half-strength  
677 MS agar solidified medium, in control conditions (1 hour treatment with eBL  
678 solvent) (**g**) or after 1 hour of 1  $\mu\text{M}$  eBL treatment (**h**) in half-strength MS agar  
679 liquid medium. Scale bar represents 10  $\mu\text{m}$  (horizontal bar). **i** Quantification of  
680 fluorescent protein signal in plasma membrane vs cytoplasm. Line scan  
681 measurements spanning membrane and cytoplasm were carried out  
682 (represented in **g** and **h** as a vertical white line), and representative plot profiles  
683 of sample measurements are presented.  
684  
685 **j-k** Quantification of the cytoplasmic and PM localization of *TTL3-GFP* in 4-day-  
686 old Arabidopsis *TTL3-GFP* 2.4 seedlings treated for 1 hour with 1  $\mu\text{M}$  eBL (**j**), or  
687 pre-treated for 12 hour with 5  $\mu\text{M}$  BRZ prior to 1  $\mu\text{M}$  eBL application for 1 hour  
688 (**k**). Analyses were carried out counting the number of cells with dual  
689 cytoplasmic/plasma membrane localization in meristematic and transition zone

690 for each analyzed root using confocal microscopy. Seedlings were grouped in  
 691 categories according to the number of cells that presented this dual localization,  
 692 and the percentage of seedlings displaying each category depicted at right side  
 693 panel was calculated. Represented categories (right side panel) indicate the  
 694 number of cells per seedling with dual cytoplasmic/plasma membrane  
 695 localization. At least 16 seedlings per treatment, and approximately 200 cells  
 696 from epidermis, cortex and endodermis per seedling of the meristematic region  
 697 of the root tip were analyzed.  
 698

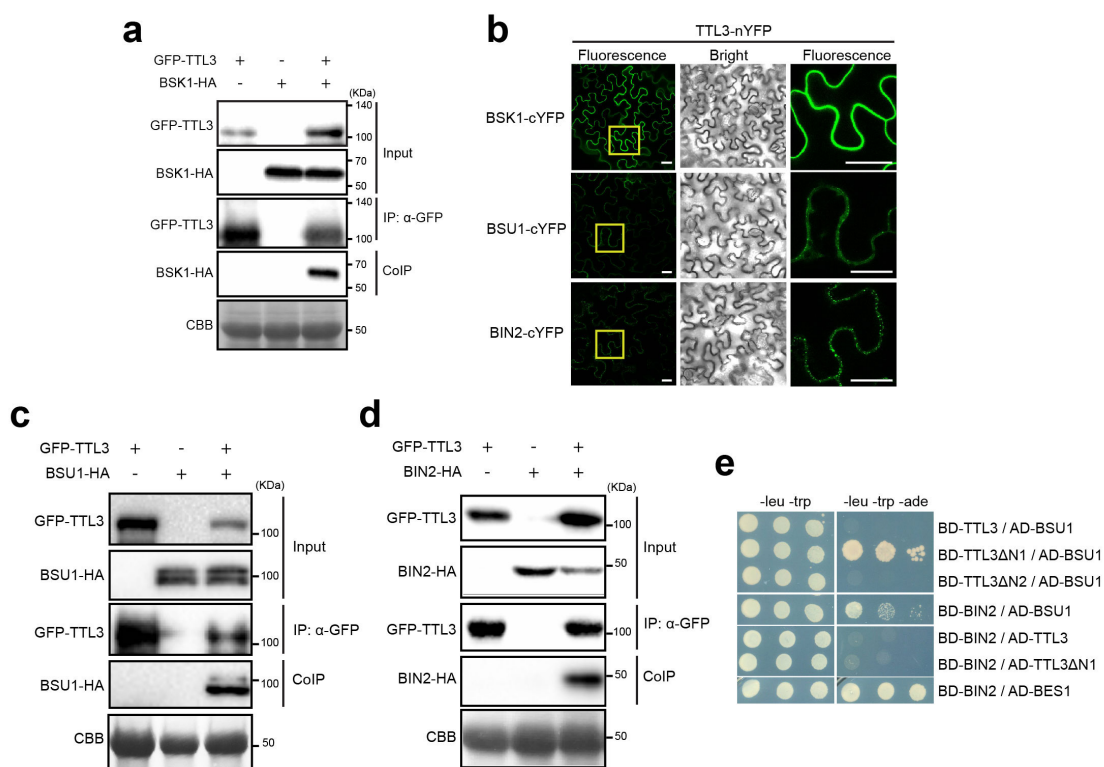

699  
 700 **Figure 4. TTL3 associates with BSK1 and BIN2 and directly interacts with**  
 701 **BSU1.**

702  
 703 **a** BSK1 co-immunoprecipitates with TTL3. BSK1-HA and GFP-TTL3 were  
 704 transiently expressed in *N. benthamiana*. GFP-TTL3 was immunoprecipitated  
 705 with anti-GFP Trap beads. Total (input), immunoprecipitated (IP) and Co-  
 706 Immunoprecipitated (CoIP) proteins were analyzed by western blotting. Equal  
 707 loading was confirmed by Coomassie blue staining (CBB) of input samples.  
 708 GFP-TTL3 and BSK1-HA were detected with anti-GFP and anti-HA antibody,  
 709 respectively.

710

711 **b** BiFC assays confirm the association of TTL3 with BSK1, BSU1 and BIN2.

712 Leaves of *N. benthamiana* were agroinfiltrated with the *Agrobacterium* strains  
713 harboring a construct to express TTL3 protein fused to the N-terminus half of  
714 the YFP and BSK1, BSU1 and BIN2 protein fused to the C-terminus half of the  
715 YFP. Using the same settings in the confocal microscope, YFP fluorescence is  
716 observed when TTL3-nYFP is co-expressed with BSK1-cYFP, BSU1-cYFP or  
717 BIN2-cYFP. From left to right columns, images show BiFC YFP fluorescence in  
718 green, bright field, and 4× magnification of BiFC YFP fluorescence of the region  
719 delimited by the yellow square. Scale bars represent 20 μm.

720

721 **c** BSU1 co-immunoprecipitates with TTL3. GFP-TTL3 and BSU-HA proteins  
722 were transiently expressed in *N. benthamiana*, immunoprecipitated and  
723 analyzed as described in **a**. GFP-TTL3 and BSU1-HA were detected with anti-  
724 GFP and anti-HA antibodies, respectively.

725

726 **d** Yeast-two-hybrid assays to determine the interaction of full-length TTL3, the  
727 TTL3 fragment TTL3ΔN1 (amino acid 204–691) and the TTL3 fragment  
728 TTL3ΔN2 (amino acid 371–691) with BIN2 and BSU1. Growth on plasmid-  
729 selective media (left column) and interaction-selective media (lacking adenine,  
730 right column) are shown.

731

732 **e** BIN2 co-immunoprecipitates with TTL3. BIN2-HA and GFP-TTL3 proteins  
733 were expressed in *N. benthamiana*, immunoprecipitated and analyzed as  
734 described in **a**. GFP-TTL3 and BSU1-HA were detected with anti-GFP and anti-  
735 HA, respectively.

736

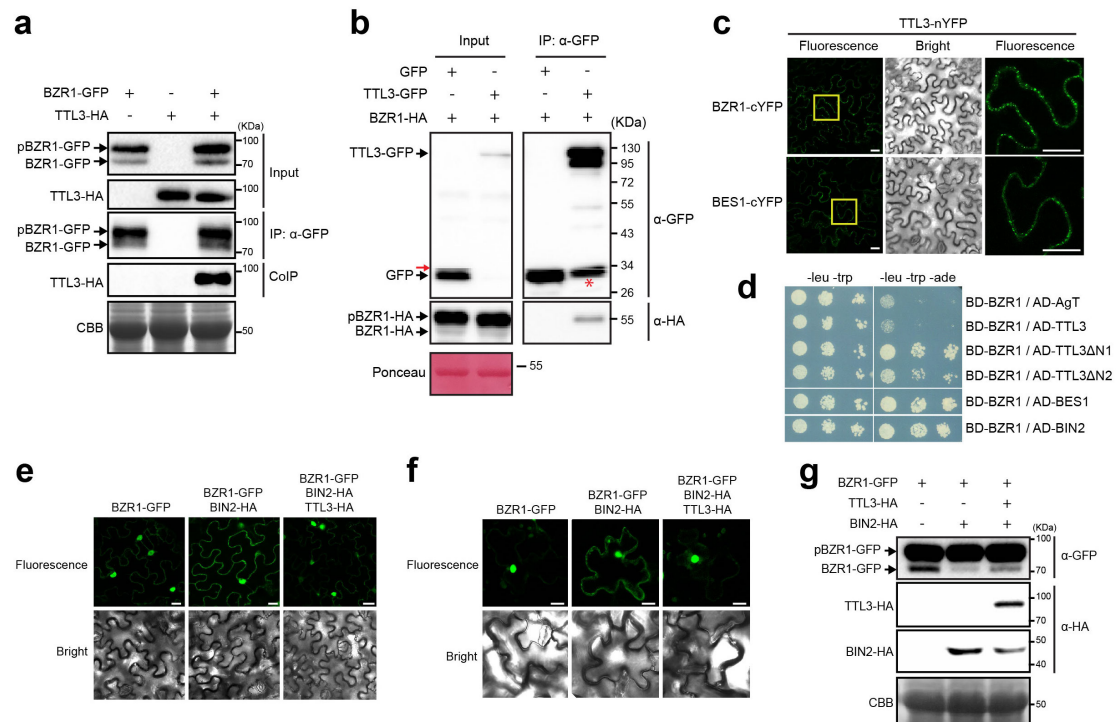

737

738 **Figure 5. TTL3 interacts with BZR1 and regulates its cytoplasmic/nuclear**  
 739 **localization**

740

741 **a** TTL3 co-immunoprecipitates with BZR1. TTL3-HA and BZR1-GFP were  
 742 transiently expressed in *N. benthamiana*. BZR1-GFP was immunoprecipitated  
 743 with anti-GFP Trap beads. Total (input), immunoprecipitated (IP) and Co-  
 744 Immunoprecipitated (CoIP) proteins were analyzed by western blotting. Equal  
 745 loading was confirmed by Coomassie blue staining (CBB) of input samples.  
 746 BZR1-GFP and TTL3-HA were detected with anti-GFP and anti-HA,  
 747 respectively. The upper band corresponds to phosphorylated BZR1 (pBZR1-  
 748 GFP) and the lower one to dephosphorylated BZR1 (BZR1-GFP).

749

750 **b** Co-immunoprecipitation of BZR1-HA with TTL3-GFP expressed in transfected  
 751 *Arabidopsis* Col-0 protoplasts. Samples were analyzed as in **a**. Protoplasts co-  
 752 transfected with free GFP and BRI1-HA, were used as a negative control for  
 753 Co-IP. Equal loading was confirmed by Ponceau staining of input samples.  
 754 TTL3-GFP and free GFP were detected with anti-GFP antibody and BRI1-HA  
 755 was detected with anti-HA antibody. Asterisk indicates GFP that results from  
 756 proteolytic cleavage of TTL3-GFP. Red arrow indicates an artefact from imaging



757 blot with high sensitivity using Azure c300 Chemiluminescent Western Blot  
758 Imaging System

759

760 **c** BiFC confirms the association between TTL3 and BZR1. Leaves of *N.*  
761 *benthamiana* were agroinfiltrated with the *Agrobacterium* strain harboring a  
762 construct to express the TTL3 protein fused to the N-terminus half of the YFP  
763 and the BZR1 or BES1 protein fused to the C-terminus half of the YFP. YFP  
764 fluorescence is observed when TTL3-nYFP is co-expressed with BZR1-cYFP or  
765 BES1-cYFP using confocal microscopy. From left to right columns, images  
766 show BiFC YFP fluorescence in green, bright field, and 4× magnification of  
767 BiFC YFP fluorescence of region delimited by the yellow square. Scale bars  
768 represent 20 μm.

769

770 **d** Yeast-two-hybrid assays to determine the interaction of BZR1 with TTL3, the  
771 TTL3 fragment TTL3ΔN1 (amino acid 204–691), the TTL3 fragment TTL3ΔN2  
772 (amino acid 371–691), BES1 and BIN2. Interaction of BZR1 with a fragment of  
773 SV40 large T-antigen (AD-AgT) was also included to show BD-BZR1 self-  
774 activation capacity. Growth on plasmid-selective media (left column) and  
775 interaction-selective media (lacking adenine, right column) are shown.

776

777 **e-f** TTL3 abolishes the cytoplasmic retention of BZR1 by BIN2. Subcellular  
778 localization of BZR1-GFP alone, co-expressed with BIN2-HA, and with BIN2-HA  
779 and TTL3-HA in *N. benthamiana* leaves (**e**) and in *NahG*-*Arabidopsis* leaves (**f**).  
780 Images of the GFP signal were obtained by using laser scanning confocal  
781 microscopy. Images show a single equatorial plane in *N. benthamiana* leaves  
782 (**e**), and a maximum Z-projection of seven 1μm spaced focal planes from the  
783 cell equatorial plane to the cell surface in *NahG*-*Arabidopsis* leaves (**f**). Scale  
784 bars represent 20 μm.

785

786 **g** Western blot analysis of the BZR1-GFP proteins transiently expressed alone,  
787 co-expressed with BIN2-HA, and co-expressed with BIN2-HA and TTL3-HA in  
788 *N. benthamiana* leaves observed by confocal microscopy in **e**. Proteins were  
789 analyzed by western blotting. Equal loading was confirmed by Coomassie blue  
790 staining (CBB) of input samples. BZR1-GFP was detected with anti-GFP

791 antibody, while TTL3-HA and BIN2-HA were detected with anti-HA antibody. In  
 792 the anti-GFP blot, the upper band corresponds to phosphorylated BZR1  
 793 (pBZR1-GFP) and the lower one to dephosphorylated BZR1 (BZR1-GFP).  
 794

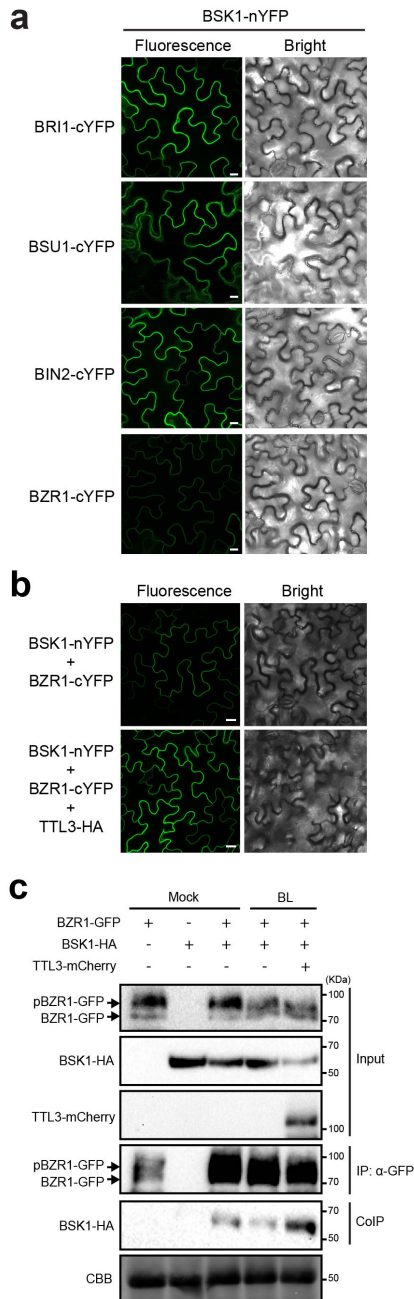

795

796 **Figure 6. TTL3 acts as a scaffold by enhancing pBZR1-BSK1 interaction**

797

798 **a** BiFC shows strong association of BSK1 with BRI1, BSU1, BIN2 and weak  
 799 association with BZR1. *N. benthamiana* leaves were co-agroinfiltrated with the  
 800 Agrobacterium strains harboring a construct to express the BSK1 protein fused



801 to the N-terminus half of the YFP and the BRI1, BSU1, BIN2 or BZR1 proteins  
802 fused to the C-terminus half of the YFP and observed under the laser scanning  
803 confocal microscope. Strong fluorescence signals are observed when BSK1-  
804 nYFP is co-expressed with BRI1-cYFP, BSU1-cYFP or BIN2-cYFP. Faint YFP  
805 signal is observed when BSK1-nYFP is co-expressed with BZR1-cYFP. From  
806 left to right columns, images show BiFC YFP fluorescence in green and bright  
807 field. Scale bars represent 20  $\mu\text{m}$ .

808

809 **b** Expression of TTL3 increases the weak BiFC association of BSK1 and BZR1.  
810 *N. benthamiana* leaves were co-agroinfiltrated with the *Agrobacterium* strains  
811 harboring the corresponding constructs to express the BSK1 protein fused to  
812 the N-terminus half of the YFP and the BZR1 protein fused to the C-terminus  
813 half of the YFP. *N. benthamiana* leaves were pre-treated with 5  $\mu\text{M}$  BL for 3  
814 hours before confocal imaging analysis. Co-expression of TTL3-HA together  
815 with BSK1-nYFP and BZR1-cYFP highly enhances GFP signal. From left to  
816 right columns, images show BiFC YFP fluorescence in green and bright field.  
817 Scale bars represent 20  $\mu\text{m}$ .

818

819 **c** TTL3 increases the amount of BSK1 immunoprecipitated by BZR1. Tagged  
820 BSK1-HA and BZR1-GFP proteins were transiently expressed in *N.*  
821 *benthamiana*. BZR1-GFP and BSK1-HA were co-expressed with or without  
822 TTL3-mCherry in *N. benthamiana* leaves and were pre-treated with mock or 5  
823  $\mu\text{M}$  BL for 3 hours as indicated in the figure. BZR1-GFP was  
824 immunoprecipitated with anti-GFP Trap beads. Total (input),  
825 immunoprecipitated (IP) and Co-Immunoprecipitated (CoIP) proteins were  
826 analyzed by western blotting. Equal loading was confirmed by Coomassie blue  
827 staining (CBB) of input samples. Co-expression of TTL3-mCherry enhanced the  
828 amount of BSK1-HA that CoIP with BZR1-GFP. BZR1-GFP and BSK1-HA were  
829 detected with anti-GFP and anti-HA antibody, respectively.

830

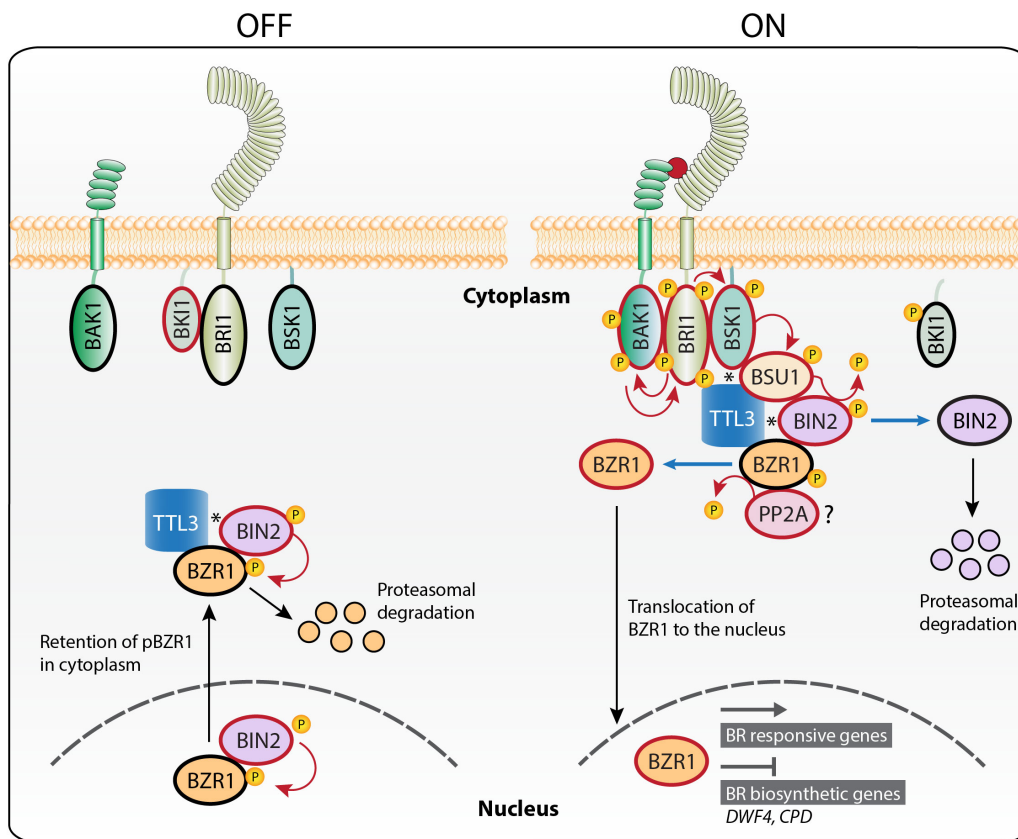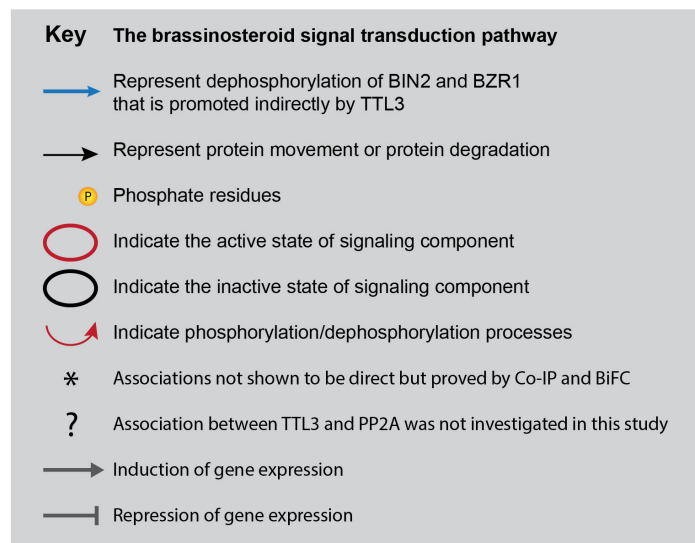

831

832 **Figure 7. A Proposed model to illustrate how TTL3 mediates a scaffolding**  
 833 **mechanism to optimize brassinosteroid signaling.**

834

835 The present study reveals that TTL3 acts as a positive regulator of  
 836 brassinosteroid (BR) signaling. Our data show that TTL3 presents mainly a  
 837 cytoplasmic localization in the absence of BR but accumulates at the plasma  
 838 membrane in response to BR perception. We show that TTL3 directly interacts

839 with BRI1, BSU1 and BZR1, and associates with BSK1 and BIN2 to assemble a  
840 BR perception protein complex at the plasma membrane in order to optimize  
841 the BZR1 dephosphorylation and active BR signaling.

842 Inactive pathway (OFF) represents the absence of BR and activated pathway  
843 (ON) the presence of BR. OFF: In the absence of BR, BRI1 is inactivated by  
844 BKI1 and the other plasma membrane components, BAK1 and BSK1, do not  
845 associate with BRI1 to form an active complex. In the cytoplasm and in the  
846 nucleus, BIN2 phosphorylates BZR1, promoting the inhibition of its DNA-binding  
847 activity and its cytoplasmic retention and subsequent degradation in a  
848 proteasome-dependent manner. ON: BR binding to the extracellular domain of  
849 BRI1 induces not only its dissociation with BKI1 but also its association with the  
850 co-receptor BAK1, which functions as a co-receptor of BR. This leads to the  
851 activation of BRI1 by trans-phosphorylation events. BAK1 activated BRI1  
852 phosphorylates BSK1 kinase and also causes re-localization of TTL3 to the  
853 plasma membrane. There, TTL3 preferentially associates with the active  
854 (phosphorylated) BSU, facilitating the dephosphorylation and inactivation of  
855 BIN2, which is subsequently degraded by the proteasome. This BIN2  
856 inactivation causes BZR1 dephosphorylation by PP2A and translocation to the  
857 nucleus to regulate the transcription of BR target genes.

858

859 TTL3, TETRATRICOPEPTIDE THIOREDOXIN-LIKE 3; BRI1,  
860 BRASSINOSTEROID INSENSITIVE 1; BAK1, BRI1-ASSOCIATED KINASE 1;  
861 BKI1, BRI1 KINASE INHIBITOR 1; BSK, BRI1 SUBSTRATE KINASE; BSU1,  
862 BRI1 SUPPRESSOR 1; BIN2, BRASSINOSTEROID INSENSITIVE 2; PP2A,  
863 PROTEIN PHOSPHATASE 2A; BZR1, BRASSINAZOLE-RESISTANT 1.

864

865

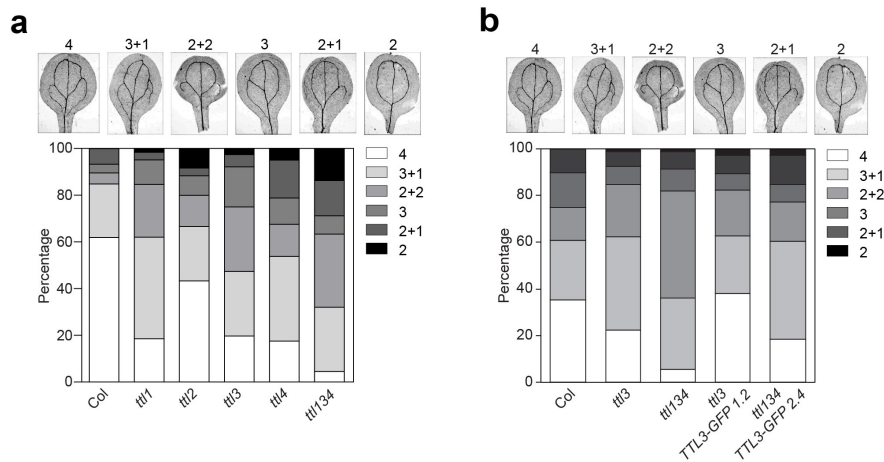

866

867 **Supplementary Figure 1. *ttl1*, *ttl3*, *ttl4* and *ttl134* are impaired in cotyledon**  
 868 **veins pattern formation.**

869

870 **a** *TTL* genes are required for cotyledon vein pattern formation. In wild-type  
 871 *Arabidopsis* cotyledons, two types of veins are present: a midvein (or primary  
 872 vein) and secondary veins that branch from the midvein to form four loops.  
 873 Increased defects occur if number of loops is reduced when secondary veins do  
 874 not connect to the base of the midvein or are absent. In *ttl1*, *ttl3* and *ttl4*  
 875 mutants, the percentage of seedlings presenting closed loops is clearly  
 876 reduced. These defects were markedly enhanced in the triple *ttl134* mutant.  
 877 Categories of cotyledon (embryonic leaves) vein patterns analyzed by  
 878 stereomicroscope in two-week-old seedlings (upper panel). Cotyledons from  
 879 two-weeks-old seedlings were observed under a light microscope to identify  
 880 vascular patterning and the percentage of cotyledons displaying each venation  
 881 pattern category is depicted at the right side of the panel (bottom panel) were  
 882 quantified. Approximately 200 cotyledons were analyzed per genotype.

883

884 **b** *TTL3p::TTL3g-GFP* expression complements cotyledon vein pattern  
 885 phenotypes of *ttl3* and *ttl134* mutants. Cotyledons vein patterns were analyzed  
 886 as described in (a).

887

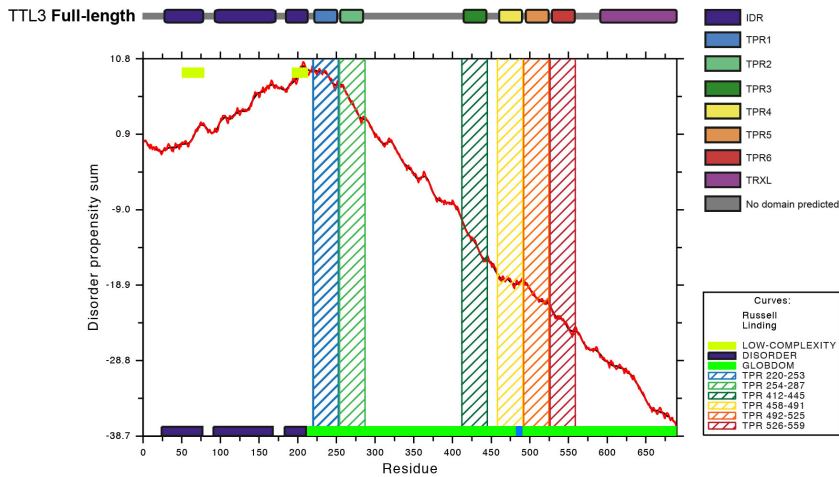

888

889 **Supplementary Figure 2. TTL3 presents an intrinsically disorder region**  
890 **(IDR) at the N-terminus.**

891

892 The first 200 amino acids of TTL3 present a disordered structure. Schematic  
893 representation of full-length TTL3 protein (upper panel) as described in **Figure**  
894 **1c** and graphical representation of the TTL3 structure using GlobPlot 2,  
895 available in the web page (<http://globplot.embl.de/>). Disorder propensity sum:  
896 up-hill regions correspond to predicted protein disorder (shown in blue) and  
897 down-hill regions correspond to putative domains (shown in green).  
898 SMART/Pfam domains are also shown.

899

900 **C.** Schematic representations of the full-length and the truncated version of  
901 TTL3 without the first 203 amino acids used for expressing the protein in yeast.

902

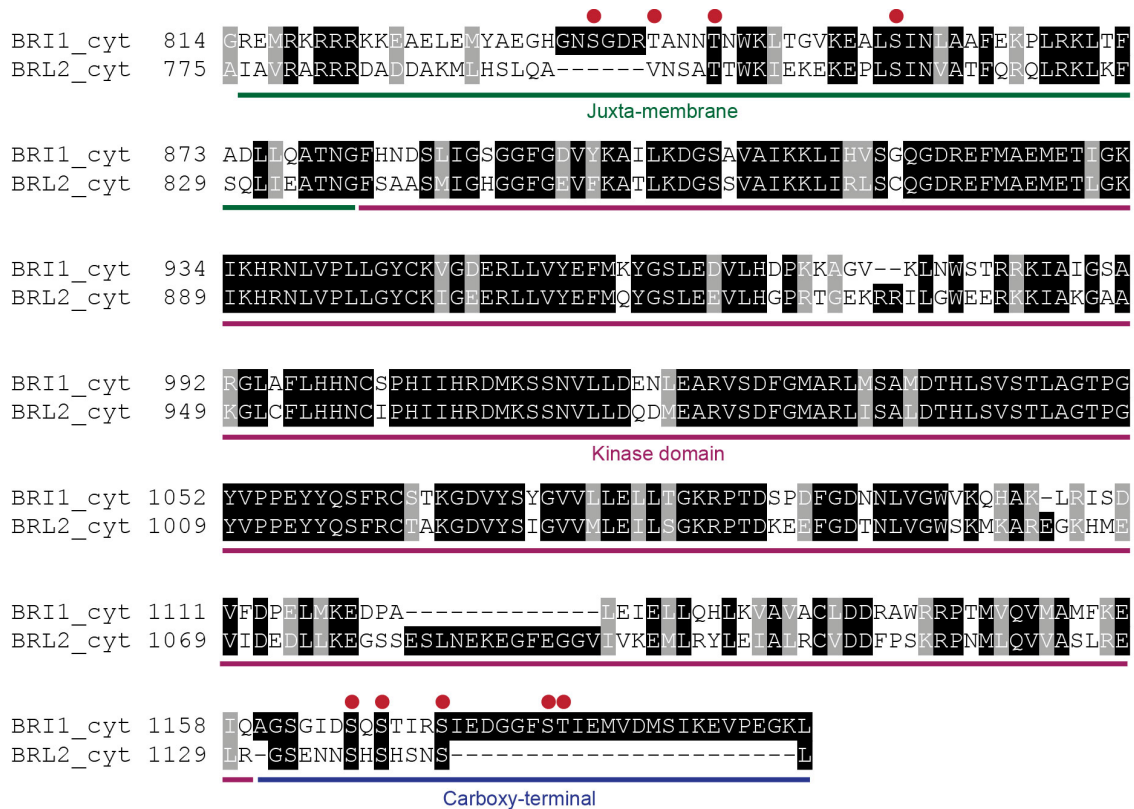

903

904 **Supplementary Figure 3. Protein sequence alignment of BRI1 and BRL2**  
 905 **cytoplasmic domain.**

906

907 The protein sequences *Arabidopsis thaliana* BRI1 (AT4G39400) and BRL2  
 908 (AT2G01950) were retrieved from the TAIR database. The multiple sequence  
 909 alignment of the cytoplasmic domain protein sequences of BRI1 (residues 814-  
 910 1196) and BRL2 (residues 775-1143) was performed using T-Coffee alignment  
 911 package (<http://tcoffee.crg.cat/apps/tcoffee/do:regular>) and formatted using the  
 912 Boxshade tool ([http://www.ch.embnet.org/software/BOX\\_form.html](http://www.ch.embnet.org/software/BOX_form.html)). The juxta-  
 913 membrane, the kinase and the carboxyl-terminal domains, are underlined in  
 914 green, magenta and blue, respectively. The Serine/Threonine residues of the  
 915 juxta-membrane and carboxyl-terminal domains that were substituted to  
 916 Aspartic Acid in the BRI1<sup>JMCT9D</sup> protein are indicated by red dots. Black and  
 917 gray boxes highlight identical and similar amino acids, respectively.

918

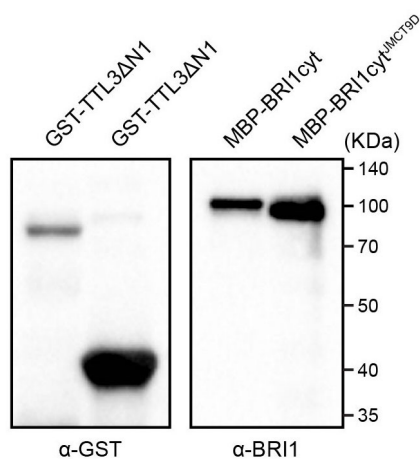

919

920 **Supplementary Figure 4. Purified GST-TTL3ΔN1, GST-TTL3ΔN3, MBP-**  
921 **BRI1cyt and MBP-BRI1cyt<sup>JMCT9D</sup> used for the GST Pull-down assays**  
922 **described in Figure 1d.**

923

924 GST and MBP tagged proteins were expressed in *E. coli*, purified and analyzed  
925 by western blot. GST-TTL3ΔN1 and GST-TTL3ΔN3 were detected with anti-  
926 GST antibody. MBP-BRI1cyt and MBP-BRI1cyt<sup>JMCT9D</sup> were detected using  
927 specific anti-BRI1 antibodies<sup>71</sup>.

928



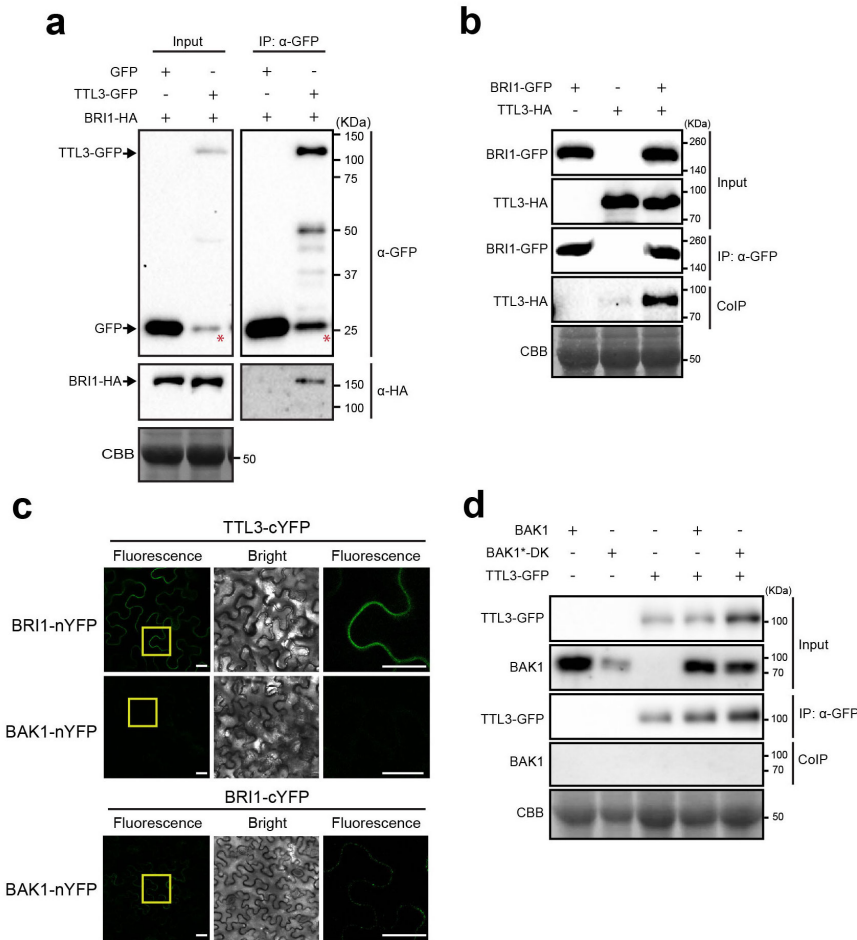

929

930 **Supplementary Figure 5. TTL3 specifically associates with BRI1 but not**  
 931 **with BAK1 or free GFP.**

932

933 **a** BRI1-HA co-immunoprecipitates with TTL3-GFP but not with free GFP.  
 934 Epitope Tagged proteins were transiently expressed in *N. benthamiana*,  
 935 immunoprecipitated and TTL3-GFP tagged protein and free GFP was  
 936 immunoprecipitated using anti-GFP Trap beads. Total (input),  
 937 immunoprecipitated (IP) and Co-Immunoprecipitated (CoIP) proteins were  
 938 analyzed by western blotting. Equal loading was confirmed by Coomassie blue  
 939 staining (CBB) of input samples. Free GFP was used as negative control for  
 940 Co-IP. TTL3-GFP and free GFP were detected with anti-GFP antibody and  
 941 BRI1-HA was detected with anti-HA antibody. Asterisks indicate GFP that  
 942 results from proteolytic cleavage of TTL3-GFP.

943

944 **b** TTL3-HA co-immunoprecipitates with BRI1-GFP. Epitope Tagged proteins  
945 were transiently expressed in *N. benthamiana*, immunoprecipitated and  
946 analyzed as indicated in **a**. BRI1-GFP and TTL3-HA were detected with anti-  
947 GFP and anti-HA antibodies, respectively.

948

949 **c** Reciprocal BiFC experiments confirm the association of TTL3 with with BRI1  
950 but not with BAK1. Leaves of *N. benthamiana* were infiltrated with the  
951 *Agrobacterium* strains harboring constructs to express TTL3 and BRI1 proteins  
952 fused to the C-terminus of the YFP and, BRI1 and BAK1 proteins fused to the  
953 N-terminus of the YFP. Using the same settings in the confocal microscope,  
954 YFP fluorescence is observed when TTL3-cYFP is co-expressed with BRI1-  
955 nYFP, but no YFP fluorescence is detected when TTL3-cYFP is co-expressed  
956 with BAK1-nYFP. A weak YFP fluorescence is observed when BRI1-cYFP is  
957 co-expressed with BAK1-nYFP. From left to right columns, images show BiFC  
958 YFP fluorescence in green, bright field, and 4× magnification of BiFC YFP  
959 fluorescence of the region delimited by the yellow square. Scale bars represent  
960 20 μm. All experiments were repeated at least three times with similar results.

961

962 **d** TTL3 does not co-immunoprecipitate BAK1 or BAK1\*-DK (dead kinase  
963 D416N). BAK1, BAK1\*-DK (dead kinase D416N) and TTL3-GFP were  
964 transiently expressed in *N. benthamiana*. Samples were immunoprecipitated  
965 and analyzed as indicated in **a**. TTL3-GFP and BAK1 were detected with anti-  
966 GFP and anti-BAK1 antibodies, respectively.

967

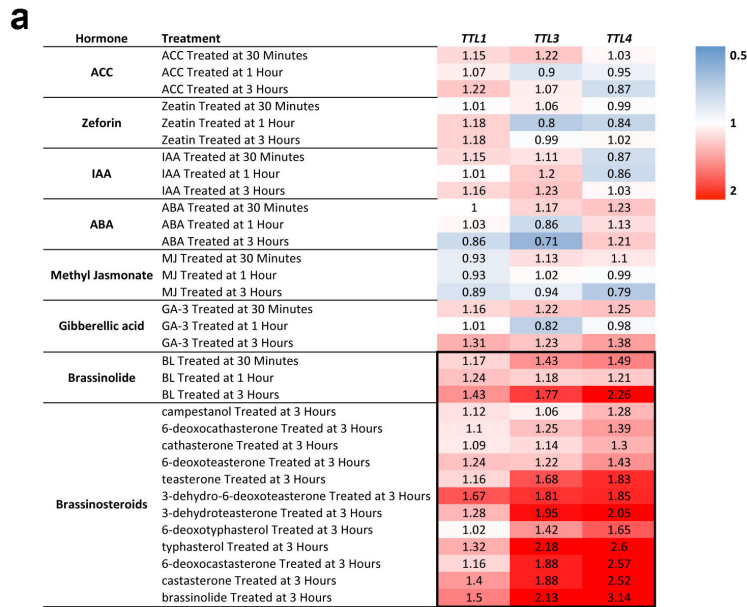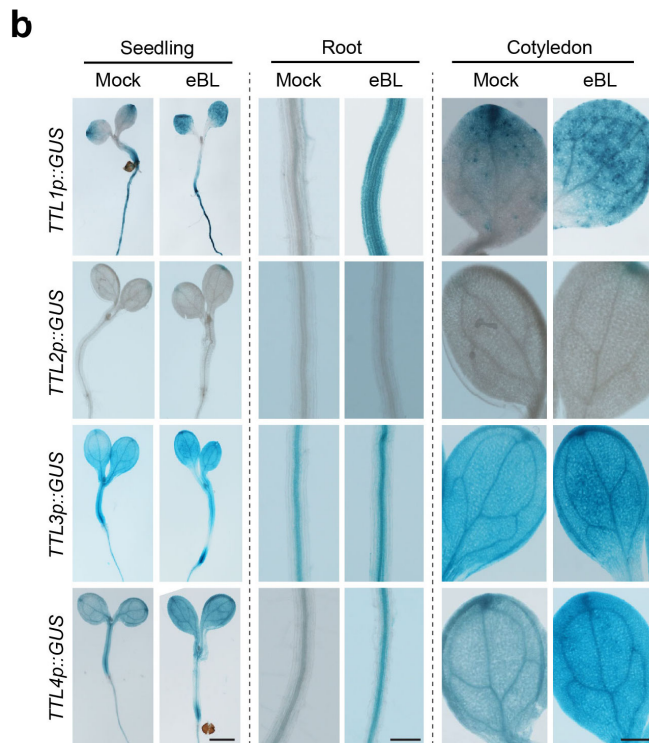

968

969 **Supplementary Figure 6. The expression of *TTL1*, *TTL3*, and *TTL4* are**  
 970 **specifically induced by BRs.**

971

972 **a** Heatmap representing the expression responses to hormone treatment of  
 973 *TTL1*, *TTL3* and *TTL4*. *TTL2* was not included due to its low expression in  
 974 vegetative organs. Expression levels of *TTL* genes are represented as the fold-  
 975 change relative to the mock treatment. Red colors represent gene induced and  
 976 blue colors represent gene repressed in response to the indicated hormone.

977 Gene expression data was retrieved from Arabidopsis eFP Browser (Hormone  
978 Series) web site available from the following link: [http://bar.utoronto.ca/efp/cgi-](http://bar.utoronto.ca/efp/cgi-bin/efpWeb.cgi)  
979 [bin/efpWeb.cgi](http://bar.utoronto.ca/efp/cgi-bin/efpWeb.cgi) (Winter et al. 2007).

980

981 **b** *TTL1*, *TTL3*, and *TTL4* promoters are activated by eBL. Histochemical  
982 analysis of *TTL* promoters-GUS reporter in control conditions and after  
983 exogenous eBL application. Four-day-old seedlings grown in control medium  
984 were transferred to a medium containing 0.2  $\mu$ M eBL for 24 hours and then  
985 stained for GUS activity. Scale bars represent 1 mm in seedlings and 200  $\mu$ m in  
986 roots and cotyledon.

987

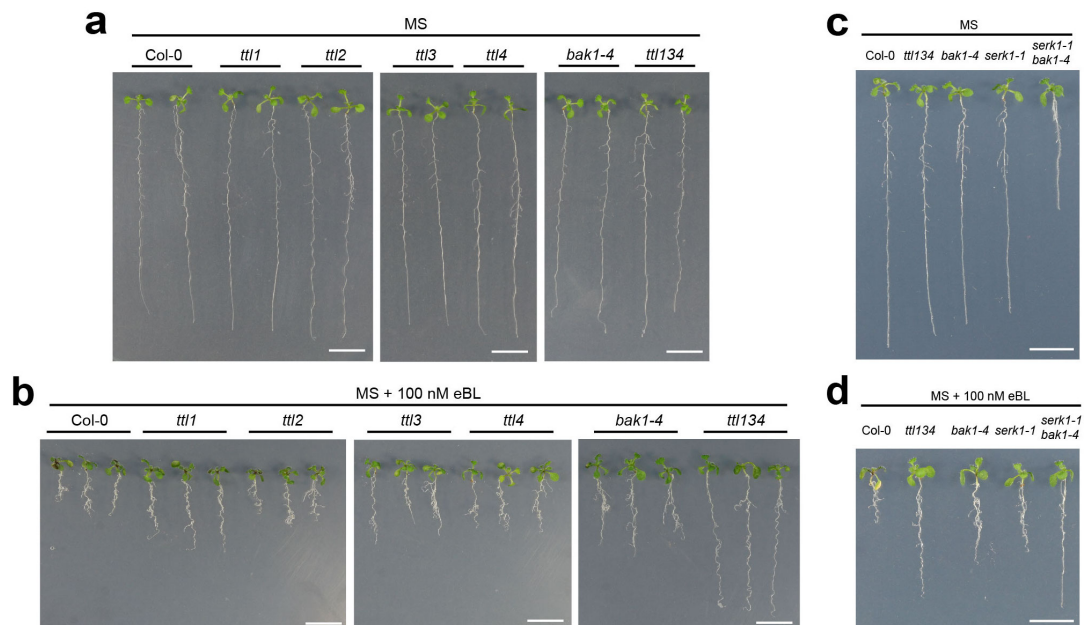

988

989 **Supplementary Figure 7. *tll1*, *tll3*, *tll4* and *tll134* show root growth**  
990 **hyposensitivity to BR.**

991

992 **a-b** Root length of WT Col-0, single *tll* mutants, the triple *tll134* and the BR  
993 perception mutant *bak1-4* in response to eBL. Seedlings were grown in long  
994 days for 4 days in half-strength MS agar solidified medium and then transferred  
995 to half-strength MS agar solidified medium (a, MS) or half-strength MS agar  
996 solidified medium supplemented with 100 nM of Brassinolide (b, MS + 100 nM  
997 eBL) and photographed 6 days later. Scale bars represent 1 cm. **C.**

998 Photographed seedlings are representative of the phenotype observed in the  
999 total analyzed replicates,  $n \geq 35$  seedlings per experiment. The experiment was  
1000 repeated three times with similar results.

1001 **c-d** Root length responses to eBL of wild-type Col-0, *tll134* and BR perception  
1002 mutants. Seedlings were grown and root length was analyzed as described in **a**.  
1003 Photographed seedlings are representative of the phenotype observed in the  
1004 total analyzed replicates,  $n = 30$  seedlings per experiment. The experiment was  
1005 repeated three times with similar results.

1006

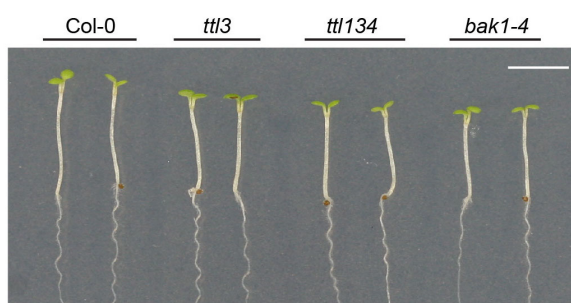

1007

1008 **Supplementary Figure 8. Defective hypocotyl elongation in *tll* mutants**

1009

1010 Col-0, *tll3*, *tll134* and *bak1-4* seedlings were grown for 4 days in long-day  
1011 photoperiod in half-strength MS agar solidified medium. Seedling with the same  
1012 size were then placed in the dark and photographed 3 days later. Scale bar  
1013 represents 5 mm. Photographed seedlings are representative of the phenotype  
1014 observed in the total analyzed replicates,  $n = 80$  seedlings per experiment. The  
1015 experiment was repeated twice with similar results.

1016

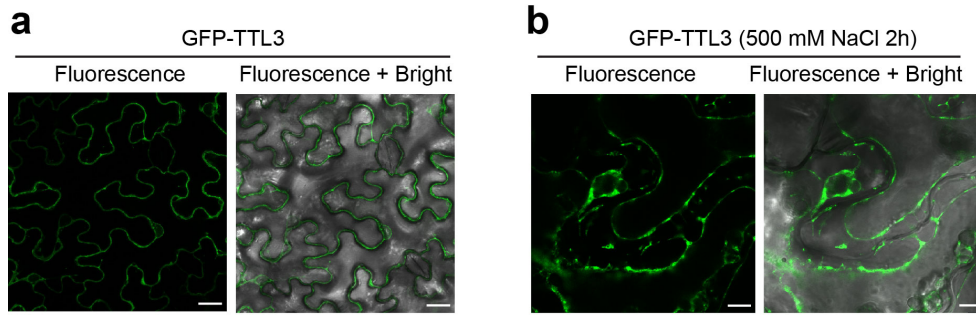

1017

1018 **Supplementary Figure 9. TTL3 presents a cytoplasmic/plasma membrane**  
1019 **sub-cellular localization.**

1020

1021 **a** Confocal microscopy images showing *N. benthamiana* transiently expressing  
1022 GFP-TTL3 indicate a main cytoplasmic localization. Scale bars represent 20  
1023  $\mu\text{m}$ .

1024

1025 **b** *N. benthamiana* leaves expressing GFP-TTL3 after plasmolysis indicates  
1026 plasma membrane localization. Leaf cells were plasmolyzed using 500 mM  
1027 NaCl for 2 hours. Confocal microscopy images show that GFP signal remains  
1028 in the retracted Hechtian strands at the plasma membrane bound to the cell  
1029 wall. Scale bars represent 10  $\mu\text{m}$ .

1030



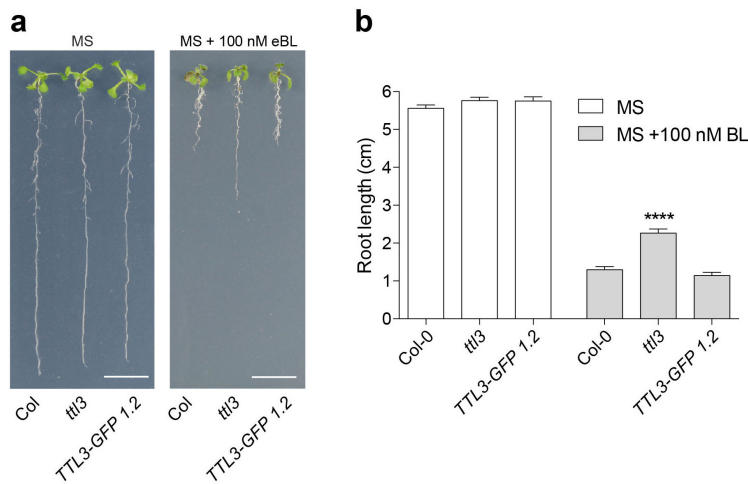

1031

1032 **Supplementary Figure 10. *TTL3-GFP 1.2* complements the root length**  
1033 **phenotype of *ttl3* in response to eBL treatment.**

1034

1035 **a** Seedlings were grown for 4 days in half-strength MS medium and then  
1036 transferred to MS medium or half-strength MS medium supplemented with 100  
1037 nM of epiBrassinolide (eBL). Seedlings were photographed 6 days later. Scale  
1038 bar represents 1 cm. **b** Statistical analysis of root length of Col-0, *ttl3* and the  
1039 complementation line *TTL3-GFP 1.2* described in **a**. Asterisks indicate statistical  
1040 differences significance between the indicated genotype vs Col-0 as determined  
1041 by the unpaired *t-test* (\*\*\*\* P ≤ 0.0001). Data represent mean values, error bars  
1042 are SEM, n=30 seedlings per experiment. The experiment was repeated three  
1043 times with similar results.

1044

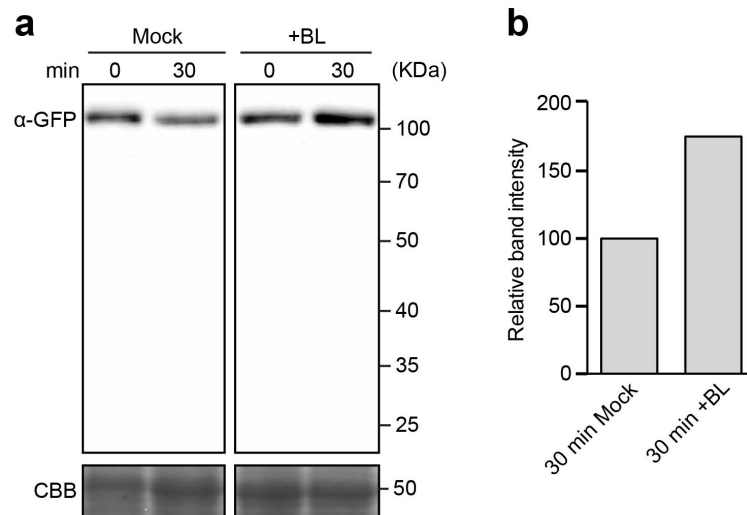

1045

1046 **Supplementary Figure 11. Western blot analyses reveals that eBL treatment**  
1047 **induces TTL3-GFP protein stabilization, and that there is no degradation-**  
1048 **products of TTL3-GFP in Arabidopsis *TTL3-GFP 2.4* line.**

1049

1050 **a** Western blot analysis of TTL3-GFP protein in 3-day-old Arabidopsis seedlings  
1051 of *TTL3-GFP 2.4*. Full scan data of the immunoblot is shown demonstrate that  
1052 there is no degradation-products of TTL3-GFP in the Arabidopsis *TTL3-GFP 2.4*  
1053 line. Seedlings of *TTL3-GFP 2.4* line were grown in control conditions (mock) or  
1054 treated with 1  $\mu$ M eBL for 30 minutes. **b** Graphical representation of the  
1055 normalized TTL3-GFP +BL protein levels expressed as relative abundance to  
1056 the amount of the TTL3-GFP mock (arbitrarily set at 100). Intensities of the  
1057 TTL3-GFP protein bands (**a** top panel) and the Coomassie blue–stained gel (**a**  
1058 bottom panel) were quantified using ImageJ software (<http://rsb.info.nih.gov/ij>).  
1059 Image shows the results from one representative experiment. Four independent  
1060 experiments were performed with similar results.

1061

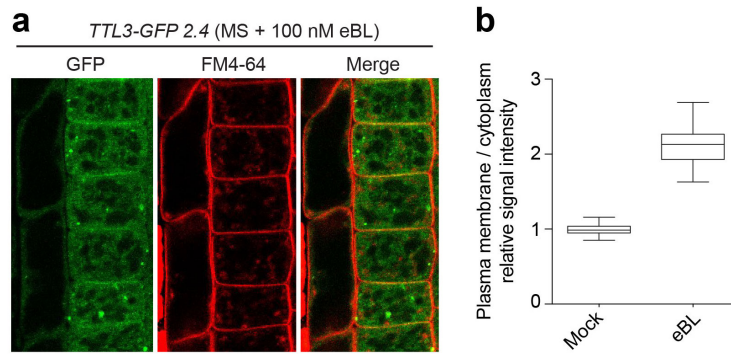

1062

1063 **Supplementary Figure 12. BRs regulate the cytoplasmic/plasma**  
1064 **membrane localization of TTL3.**

1065

1066 **a** Confocal microscopy image showing the localization of TTL3-GFP  
1067 fluorescence in epidermal cells from root meristematic zone of 4-day-old *TTL3-*  
1068 *GFP 2.4* after 1 hour of 1  $\mu$ M eBL treatment. Red channel shows the plasma  
1069 membrane stained with FM4-64. Scale bar represents 10  $\mu$ m.

1070

1071 **b** Quantification of the GFP signal in plasma membrane vs cytoplasm. To  
1072 measure the ratio between plasma membrane and cytoplasmic signals, a small  
1073 area of fixed size (8 pixels) was drawn, and measurements of integrated  
1074 densities were taken from representative areas within the plasma membrane  
1075 and cytoplasm of each cell. To delimitate the plasma membrane area, FM4-64  
1076 was used to stain the cells as depicted in **a**. Average ratios between plasma  
1077 membrane and cytoplasmic signal intensities were calculated based on  
1078 measurements from 3 cells per plant. 10 plants analyzed. N=30. This  
1079 experiment was repeated twice with similar results.

1080

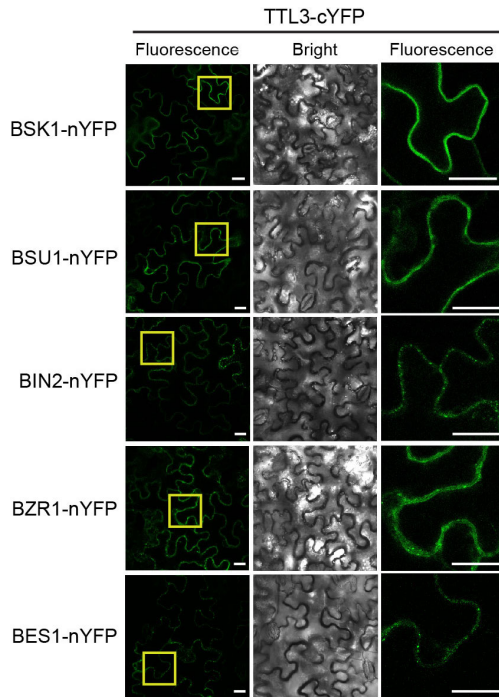

1081

1082 **Supplementary Figure 13. TTL3 associates with BSK1, BSU1, BIN2, BZR1**  
1083 **and BES1 by BiFC Reciprocal BiFC experiments.**

1084

1085 Reciprocal BiFC experiments confirm the interaction of TTL3 with BSK1, BSU1,  
1086 BIN2, BZR1 and BES1. Leaves were co-agroinfiltrated with the *Agrobacterium*  
1087 strain harboring a construct to express the TTL3 protein fused to the C-terminus  
1088 of the YFP, and the BSK1, BSU1, BIN2, BZR1 and BES1 proteins fused to the  
1089 N-terminus of the YFP. By confocal microscopy, YFP fluorescence is observed  
1090 when TTL3-cYFP is co-expressed with BSK1-nYFP, BSU1-nYFP, BIN2-nYFP,  
1091 BZR1-nYFP and BES1-nYFP. From left to right columns, images show BiFC  
1092 YFP fluorescence in green, bright field, and 4X magnification of BiFC YFP  
1093 fluorescence of region delimited by the yellow square. Scale bars represent 20  
1094  $\mu\text{m}$ .

1095

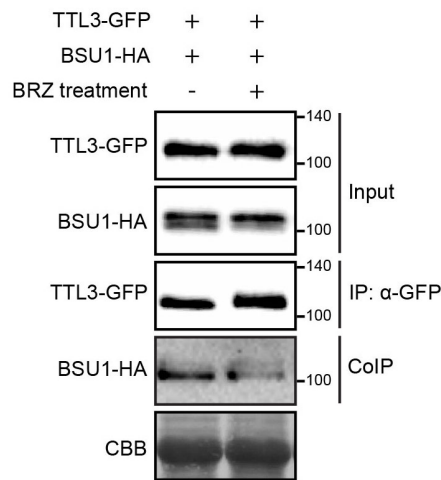

1096

1097 **Supplementary Figure 14. TTL3 preferentially associates with active BSU1**  
1098 **by CoIP.**

1099

1100 TTL3 preferentially associates with active BSU1. BSU1-HA and TTL3-GFP  
1101 proteins were transiently expressed in *N. benthamiana* pre-treated with mock  
1102 solution or with 5  $\mu$ M BRZ for 48h. TTL3-GFP was immunoprecipitated with  
1103 anti-GFP Trap beads. Total (input), immunoprecipitated (IP) and Co-  
1104 Immunoprecipitated (CoIP) proteins were analyzed by western blotting. Equal  
1105 loading was confirmed by Coomassie blue staining (CBB) of input samples.  
1106 GFP-TTL3 and BSU1-HA were detected with anti-GFP and anti-HA antibody,  
1107 respectively. The Co-IP shows an enrichment of the lower BSU1 band, despite  
1108 the decrease in the input caused by BRZ.

1109

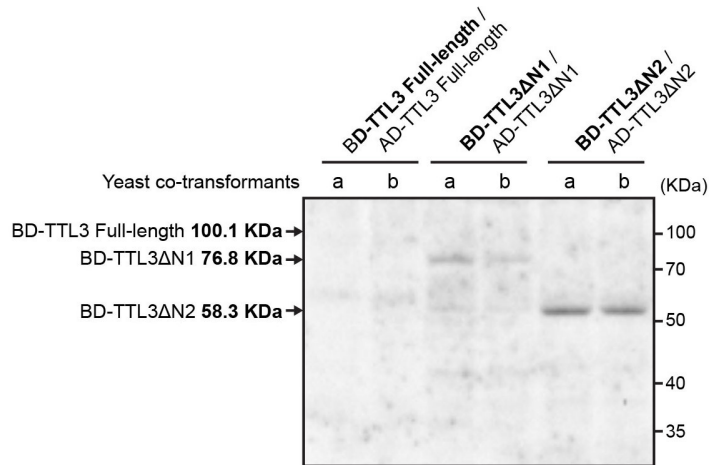

1110

1111 **Supplementary Figure 15. TTL3 N-terminus negatively affects the**  
1112 **stabilization of TTL3 protein in yeast heterologous system.**

1113

1114 Protein extracts of two independent yeast co-transformants (a and b) for each  
1115 bait-prey plasmid combination were resolved in polyacrylamide/SDS-Page gels  
1116 and analyzed by western blot using a anti-Myc Tag monoclonal antibody. Myc  
1117 Tag is transcriptionally fused to BD-fused protein (in bold). The expected  
1118 molecular size of BD-TTL3 Full-length, BD-TTL3ΔN1 and TTL3ΔN2 is  
1119 represented in the figure.

1120



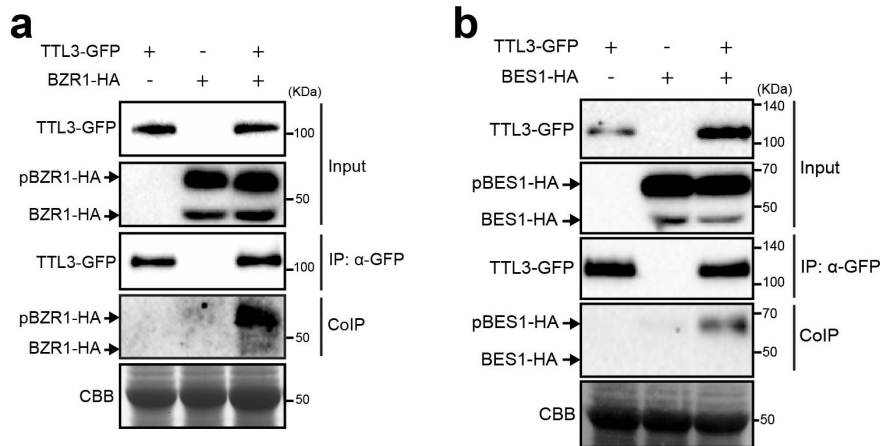

1121

1122 **Supplementary Figure 16. TTL3 preferentially associates with**  
1123 **phosphorylated (inactive) form of BZR1 and BES1 by CoIP**

1124

1125 **a** Co-immunoprecipitation of BZR1 with TTL3 indicates a preferential  
1126 association of TTL3 with pBZR1. BZR1-HA and TTL3-GFP were transiently  
1127 expressed in *N. benthamiana* and TTL3-GFP was immunoprecipitated with anti-  
1128 GFP Trap beads. Total (input), immunoprecipitated (IP) and Co-  
1129 Immunoprecipitated (CoIP) proteins were analyzed by western blotting. Equal  
1130 loading was confirmed by Coomassie blue staining (CBB) of input samples.  
1131 TTL3-GFP and BZR1-HA were detected with anti-GFP and anti-HA,  
1132 respectively. The upper band corresponds to phosphorylated BZR1 (pBZR1-  
1133 GFP) and the lower one to dephosphorylated BZR1 (BZR1-GFP).

1134

1135 **b** BES1 co-immunoprecipitates with TTL3. BES1-HA and TTL3-GFP were  
1136 transiently expressed in *N. benthamiana*, immunoprecipitated and analyzed by  
1137 western blot as indicated in **a**. TTL3-GFP and BES1-HA were detected with  
1138 anti-GFP and anti-HA, respectively.

1139

## 1140 Supplemental Tables

1141

1142 **Table S1.** List and description of primers used for cloning into pENTR.

1143 Restriction sites included in some primers are highlighted in bold and enzyme is  
 1144 indicated in the primer name. CACC sequence include in Fw primers to clone in  
 1145 pENTR/D-TOPO (Invitrogen) is underlined. STOP codon in primers sequence is  
 1146 highlighted in gray.

1147

| Description                                                     | Primer Name        | Primer Sequence (5'→3')                        |
|-----------------------------------------------------------------|--------------------|------------------------------------------------|
| TTL3 (AT2G42580) CDS                                            | F TTL3             | CACCATGTCTCATTCTAGAAGA                         |
|                                                                 | R TTL3             | TAAGAGGAAATGCTTTATAGAGTC                       |
| TTL3 genomic sequence including promoter                        | TTL3p2 Topo FW     | ATTAGTGGTTCCGTAGGTC                            |
|                                                                 | R TTL3             | TAAGAGGAAATGCTTTATAGAGTC                       |
| TTL3ΔN1 (residuos 204-691)                                      | TTL3 EcoRI Fw2     | <u>CACCGAATTC</u> GGAGGAACCAGCGGAAAG           |
|                                                                 | TTL3 Xho stop Rv1  | <b>CTCGAGT</b> CATAAGAGGAAATGCTTTATAGAGTC      |
| TTL3ΔN2 (residuos 371-691)                                      | Fw3                | <u>CACCGAATTC</u> GCAGAAGCCTTTTTGCGTC          |
|                                                                 | Rv1                | <b>CTCGAGT</b> CATAAGAGGAAATGCTTTATAGAGTC      |
| TTL3ΔC1 (residuos 1-306)                                        | Fw1                | <u>CACCGAATTC</u> ATGTCTCATTCTAGAAGACTTTC      |
|                                                                 | Rv2                | <b>CTCGAGT</b> CA ATTCTCAGCTTCACCCAATC         |
| TTL3ΔC2 (residuos 1-595)                                        | Fw1                | <u>CACCGAATTC</u> ATGTCTCATTCTAGAAGACTTTC      |
|                                                                 | Rv3                | <b>CTCGAGT</b> CACAAAGTCGAAACCGCTTCA           |
| TTL3ΔN3 (residuos 567-691)                                      | Fw4                | <u>CACCGAATTC</u> CGAGAGAGCGAAAACAGTGC         |
|                                                                 | Rv1                | <b>CTCGAGT</b> CATAAGAGGAAATGCTTTATAGAGTC      |
| BRI1 (AT4G39400) and BRI1 <sup>JMCT9D</sup> (residues 814–1196) | BRI1_cyt EcoRI Fw1 | <u>CACCGAATTC</u> GGTAGAGAGATGAGGAAGAGACG      |
|                                                                 | BRI1_cyt BamHI Rv2 | <b>GGATCCT</b> CATAATTTTCCTTCAGGAACTTCTTTTATAC |
| BSK1 (AT4G35230) CDS                                            | BSK1 EcoRI Fw1     | <u>CACCGAATTC</u> ATGGGTTGTTGTCAATCCTTGTTTTC   |
|                                                                 | BSK1 no stop Rv1   | AGATCCTCTGCCGCCTCG                             |
| BES1 (AT1G19350) CDS                                            | BES1-6 Topo Fw1    | CACCATGACGTCTGACGGAGCAAC                       |
|                                                                 | BES1-6 no stop Rv1 | ACTATGAGCTTTACCATTTC CAAGC                     |

1148

1149

1150 **Table S2.** List of primers used for quantitative RT-PCR.

| Description                                                   | Primer Name   | Primer Sequence (5'→3')   |
|---------------------------------------------------------------|---------------|---------------------------|
| Real-time PCR primer for Actin 2<br>(AT3G18780) <sup>73</sup> | qRT Actina-Fw | CTAAGCTCTCAAGATCAAAGGCTTA |
|                                                               | qRT Actina-Rv | ACTAAAACGCAAACGAAAGCGGTT  |
| Real-time PCR primer for CPD<br>(At5g05690) <sup>48</sup>     | CPD QRT Fw1   | TTGCTCAACTCAAGGAAGAG      |
|                                                               | CPD QRT Rv1   | TGATGTTAGCCACTCGTAGC      |
| Real-time PCR primer for DWF4<br>(At3g50660) <sup>48</sup>    | DWF4 QRT Fw1  | CATAAAGCTCTTCAGTCACGA     |
|                                                               | DWF4 QRT Rv1  | CGTCTGTTCTTTGTTTCCTAA     |

1151

## 1152 **METHODS**

1153

### 1154 **Plant Material and Growth Conditions**

1155

1156 All *Arabidopsis thaliana* plants used in the present study were Columbia-0  
1157 ecotype (Col-0). *Arabidopsis* mutants lines used in this study have been  
1158 previously described: *ttl1* (AT1G53300) Salk\_063943; *ttl2* (AT3G14950)  
1159 Salk\_106516; *ttl3* (AT2G42580) Sail\_193\_B05; *ttl4* (AT3G58620) Salk\_026396;  
1160 *ttl134*: *ttl1 ttl3 ttl4* triple mutant<sup>12</sup>; *bak1-4* (SALK\_116202)<sup>28</sup>; *serk1-1*  
1161 (SALK\_044330)<sup>74</sup> and *serk1-1 bak1-4* double mutant (obtained by crossing  
1162 *serk1-1* with *bak1-4*). Transgenic lines *TTL1p::GUS*; *TTL2p::GUS*; *TTL3p::GUS*  
1163 and *TTL4p::GUS*<sup>12</sup> were also previously described. Generation of transgenic  
1164 lines *TTL3-GFP 1.2* (*TTL3p::TTL3g-GFP* line 1.2 in *ttl3* background) and *TTL3-*  
1165 *GFP 2.4* (*TTL3p::TTL3g-GFP* line 2.4 in *ttl134* background) is described in the  
1166 **Generation of Transgenic Plants** section.

1167

1168

### 1169 **Plant Manipulation and Growth Conditions**

1170

1171 *Arabidopsis* standard handling procedures and conditions were employed to  
1172 promote seed germination and growth. Seeds were surface sterilized and cold  
1173 treated for three days at 4°C. Then, seeds were sowed onto half-strength  
1174 Murashige-Skoog agar solidified medium (0.6% (w/v) agar for horizontal growth  
1175 and 1% (w/v) for vertical growth) containing 1.5% sucrose, unless otherwise  
1176 stated. Plates were placed either vertically or horizontally in a culture chamber  
1177 at 22 ± 1°C, under cool white light (120 μmol photon m<sup>-2</sup> s<sup>-1</sup>) with a long-day  
1178 photoperiod (16-h light/8-h dark cycle) unless otherwise stated. When required,  
1179 seedlings were transferred to soil after seven days of in vitro growth and  
1180 watered every two days. In soil, plants were grown in a mixture of organic  
1181 substrate and vermiculite (4:1 v/v) under controlled conditions: 23 ± 1°C °C, 16-  
1182 h light/8-h dark cycle (~120 μmol photon m<sup>-2</sup> s<sup>-1</sup>). Freshly harvested seeds were  
1183 used for all the phenotypic analysis.

1184

## 1185 **Plasmid Constructs**

1186 A genomic fragment spanning the 1.7 kb *TTL3* promoter (*TTL3p*) region  
1187 upstream of the start codon and the *TTL3* genomic region (*TTL3g*) without stop  
1188 codon was PCR amplified using the primers detailed in **Table S1** and cloned  
1189 into pCR8 ENTRY vector (Invitrogen).

1190 The coding DNA sequence (CDS) without the stop codon of *TTL3*, *BSK1* and  
1191 *BES1* (*BES1-S*, the canonical *BES1* isoform), as well as the CDS with stop  
1192 codon of wild-type *BRI1* cytoplasmic domain (residues 814–1196), *BRI1*  
1193 cytoplasmic domain JMCT9D (*BRI1*cyt<sup>JMCT9D</sup> residues 250–662), and *TTL3*  
1194 truncated version *TTL3ΔN1* (residues 204–691), *TTL3ΔN2* (residues 371–691),  
1195 *TTL3ΔN3* (residues 567–691), *TTL3ΔC1* (residues 1–306) and *TTL3ΔC2*  
1196 (residues 1–595) was PCR amplified using the primers detailed in **Table S1** and  
1197 cloned into the *pENTR/D-TOPO* vector using the pENTR Directional TOPO  
1198 cloning kit (Invitrogen). The pUNI51 (Salk Institute) cDNA clone was used as  
1199 template to PCR amplify *TTL3* CDS without the stop codon. Total RNA from  
1200 *Arabidopsis Col-0* was used to generate cDNA that was then employed as  
1201 template to PCR amplify *BSK1* CDS without the stop codon. The destination  
1202 vector pGADT7(GW)*BES1*<sup>32</sup> was a gift from Salomé Prat (CNB-CSIC), and it  
1203 was used as template to PCR amplify *BES1* (*BES1-S*, the canonical *BES1*  
1204 isoform correspond to the *BES1-6* transcript). The expression clone pMAC-flag-  
1205 *BRI1-CD-JMCT9D*<sup>70</sup> was used, as template to PCR amplification of  
1206 *BRI1*cyt<sup>JMCT9D</sup> and it was a gift from Xiaofeng Wang (College of Horticulture  
1207 Northwest, A&F University, Yangling Shaanxi).

1208 pENTR vectors including CDS without stop codon of *BRI1*, *BAK1*, *BIN2*, *BSU1*  
1209 and *BZR1*, were obtained by Gateway BP-reaction (Invitrogen) using an  
1210 expression clone for each gene of interest (containing *attB* sites) and the  
1211 pDONR/Zeo vector. Expression clones, used as templates for cloning *BRI1*,  
1212 *BAK1*, and *BZR1* in pENTR/D-Topo by Gateway BP-reaction, were previously  
1213 published<sup>29,75</sup>. The expression clones used to clone *BSU1*<sup>63</sup> and *BIN2*<sup>32</sup> in  
1214 pENTR/D-Topo by Gateway BP-reaction, were a gift from Santiago Mora Garcia  
1215 (Fundación Instituto Leloir and IIBBA) and Salomé Prat (CNB-CSIC),  
1216 respectively.

1217 All the resulting pENTR clones were verified by diagnostic PCR, restriction  
1218 analysis and sequencing. These pENTR clones in combination with the  
1219 appropriate destination vectors (pDEST) were used to create the final Gateway-  
1220 expression constructs, by LR-reaction (Invitrogen). The pETG-30A and pETG-  
1221 30A vectors were provided by the European Molecular Biology Laboratory  
1222 (EMBL) and were used as pDEST to generate GST and MBP N-terminus fusion  
1223 proteins for GST-pull-down assays. The pGWB4, 5, 6 and 14, from the pGWBs  
1224 vectors series, were provided by Tsuyoshi Nakagawa<sup>76</sup> (Department of  
1225 Molecular and Functional Genomics, Shimane University), and were used as  
1226 pDEST for the transient expression in *N. Benthamiana* in the Co-IP and co-  
1227 expression assays (pGWB5, 6 and 14) or for generating stable transgenic  
1228 Arabidopsis lines (pGWB4). The pDEST-GW-VYNE and pDEST-GW-VYCE<sup>77</sup>  
1229 were used for BiFC assays. The Gateway destination vector pUC19(35S::GW-  
1230 GFP) and pBSSK(35S::GW-HA) were used to transfect protoplast for transient  
1231 expression and Co-IP assays. The pUC19(35S::GW-GFP) was provided by  
1232 José Alonso (Department of Plant and Microbial Biology, North Carolina State  
1233 University), and contains pGWB5 cassette between HindIII-SacI restriction sites  
1234 in pUC19 vector backbone. The pBSSK(35S::GW-HA) was generated in this  
1235 work by cloning the pGWB14 cassette between HindIII-SacI in the pBSSK  
1236 vector backbone. The pGADT7(GW) and pGBKT7(GW) destination vectors  
1237 were provided by Salomé Prat (CNB-CSIC) and used for yeast two-hybrid  
1238 assay. All the expression clones were verified by diagnostic PCR and restriction  
1239 analysis.

#### 1240 **Generation of Transgenic Plants**

1241 Expression constructs were transformed into *Agrobacterium tumefaciens* strain  
1242 GVG3101::pMP90 through electroporation and confirmed by diagnostic PCR.  
1243 The pGWB4 harboring the *TTL3p::TTL3g-GFP* construct, was transformed into  
1244 Arabidopsis plants by floral dip<sup>78</sup> to generate stable transgenic plants.  
1245 *TTL3p::TTL3g-GFP* was transformed into both the *ttl3* single mutant and the  
1246 *ttl134* triple mutant. T3 or T4 homozygous transgenic plants were used in this  
1247 study.

1248



## 1249 **Phenotypic Analysis**

### 1250 *Venation pattern phenotype*

1251 Cotyledons (embryonic leaves) from two-week-old seedlings were cleared and  
1252 observed under a light microscope to analyze vascular patterning and the  
1253 percentage of cotyledons displaying each venation pattern categories is  
1254 depicted in **Supplementary Fig. 1**. Approximately 200 cotyledons per genotype  
1255 were analyzed. Representative images of each observed venation pattern  
1256 categories were acquired using the Nikon AZ100 Multizoom microscope  
1257 system.

1258 For clearing cotyledons, the two-week-old seedlings were immersed  
1259 sequentially in 50% ethanol for 1 hour, 99% ethanol overnight, and 50% ethanol  
1260 for 1 hour, and finally transferred to ddH<sub>2</sub>O. Seedlings were mounted on slides  
1261 in 50% glycerol and visualized under a light microscope or using the Nikon  
1262 AZ100 Multizoom microscope system as described above.

1263

### 1264 *BL Sensitivity Determined by Root Growth Inhibition*

1265

1266 Seedling were grown vertically in long-day photoperiod for 4 or 5 days in half-  
1267 strength MS agar solidified medium supplemented with 1.5% (w/v) sucrose, and  
1268 then transferred to half-strength MS agar solidified medium supplemented with  
1269 1,5% (w/v) sucrose containing either mock (eBL solvent as control) or 100 nM  
1270 eBL (PhytoTechnology Laboratories) and photographed 6 or 8 days later. The  
1271 eBL (PhytoTechnology Laboratories) was added from a 5 mM stock solution  
1272 freshly prepared in 80% (v/v) ethanol.

1273 To determine the eBL sensitivity of Col-0 and mutants, the root length of 10 or  
1274 13-day-old seedlings grown vertically as described above was measured and  
1275 the data were analyzed as described in "*Quantification and Statistical Analysis*"  
1276 section.

1277

1278

1279

1280

1281 *BL Sensitivity Determined by Phosphorylation status of BES1*

1282

1283 Seedlings were grown vertically in long-day photoperiod for 7 days in half-  
1284 strength MS agar solidified medium supplemented with 1.5% (w/v) sucrose, and  
1285 then transferred to half-strength MS liquid medium supplemented with 1.5%  
1286 (w/v) sucrose containing 2.5  $\mu$ M BRZ (TCI Europe) and grown for 3 more days.  
1287 To determine the eBL sensitivity of Col-0 and *tt134*, the seedlings were treated  
1288 with either mock (eBL solvent as control) or 10 nM eBL (PhytoTechnology  
1289 Laboratories) and frozen in liquid nitrogen 0, 30 and 60 minutes after the  
1290 treatment. Total protein was extracted as described in “**Extraction of Total**  
1291 **Protein from Arabidopsis**” section and analyzed by immunoblotting using an  
1292 anti-BES1 antibody (dilution 1:500) (Yu et al., 2011) as described in the  
1293 “**Western Blot Analysis**” section.

1294

1295 *Hypocotyl elongation in dark*

1296 Freshly harvested seeds were surface sterilized and cold treated for three days  
1297 at 4°C. Then, seeds were sowed individually onto half-strength Murashige-  
1298 Skoog 1% (p/v) agar solidified medium containing 1.5% sucrose for vertical  
1299 growth. Seedlings were grown for 4 days in long-day photoperiod, and then  
1300 placed in dark condition (vertical growth in a culture chamber at 22  $\pm$  1°C).  
1301 Seedlings were photographed and hypocotyl length was measured 3 days after  
1302 placing plates in dark conditions.

1303

1304 **Total RNA Extraction and Semi-quantitative RT-PCR Analysis**

1305 Ten-day-old seedlings (10 seedlings per biological replicate) grown for five days  
1306 on half-strength MS agar solidified medium were transferred to half-strength MS  
1307 liquid medium supplemented with 1% (w/v) sucrose (grown for 5 extra days),  
1308 treated with or without 1  $\mu$ M eBL for 1 hour, were used to total RNA extraction.  
1309 The eBL (PhytoTechnology Laboratories) was added from a 5 mM stock  
1310 solution freshly prepared in 80% (v/v) ethanol. Plant tissue was grounded to a  
1311 fine powder in liquid nitrogen. Approximated 100 mg of ground tissue per

1312 sample were homogenized in 1 mL of the commercial reagent TRIsure (Bioline),  
1313 and total RNA was extracted following the manufacturer's instructions. The RNA  
1314 concentration and purity was determined spectrophotometrically (Nanodrop ND-  
1315 1000 Spectrophotometer). RNA samples (10µg per sample) were DNase-  
1316 treated with Turbo DNA-free DNase (Ambion) and 1 µg of RNA per sample was  
1317 run on a 1% agarose gel to confirm RNA integrity. First-strand cDNA was  
1318 synthesized from 1 µg of RNA by using the iScript cDNA synthesis kit (BioRad),  
1319 according to the manufacturer's instructions. cDNAs were amplified in triplicate  
1320 by quantitative PCR by using SsoFast EvaGreen supermix (BioRad) and the  
1321 MyiQ Thermal cycler (Bio Rad). The relative expression values were  
1322 determined by using *ACTINE 2* as a reference gene and plotted relative to Col-  
1323 0 mock treated expression level. Primers used for quantitative RT-PCR are  
1324 listed in **Table S2**.

1325

#### 1326 **Transient Expression in *N. benthamiana***

1327 For transient expression in *Nicotiana benthamiana*, *Agrobacterium tumefaciens*  
1328 (GV3101::pMP90) carrying the different constructs were used together with the  
1329 p19 strain<sup>79</sup> for infiltration into 4- to 5-week-old *N. benthamiana* leaves at the  
1330 abaxial side of the leaf lamina. After infiltration, all plants were kept in the  
1331 greenhouse and analyzed 2 days later. *Agrobacterium* cultures were grown  
1332 overnight in LB medium containing rifampicin (50 µg/mL), gentamycin (25  
1333 µg/mL) and the construct specific antibiotic. Cells were then harvested by  
1334 centrifugation (15 minutes, 3000g in 50 mL falcon tubes), pellets were  
1335 resuspended in agroinfiltration solution (10 mM morpholineethanesulfonic acid  
1336 (MES) pH 5.6, 10 mM MgCl<sub>2</sub>, and 1 mM acetosyringone) and incubated 2 hours  
1337 in dark conditions at room temperature. For double infiltration experiments,  
1338 *Agrobacterium* strains were infiltrated at optical density at 600 (OD<sub>600</sub>) of 0.4 for  
1339 the constructs and 0.2 for the p19 strain. For triple infiltration experiments,  
1340 *Agrobacterium* strains were infiltrated at OD<sub>600</sub> of 0.26 for the constructs and at  
1341 OD<sub>600</sub> of 0.2 for the p19 strain. An *Agrobacterium* strain harboring an empty  
1342 vector (or GUS-HA expressing vector) was used as a negative control to equal  
1343 the final optical density, in order to obtain a total OD<sub>600</sub> of approximated 1 in all  
1344 the infiltration experiments.

1345 For eBL treatment analysis, leaves were pre-treated with 5  $\mu$ M BL for 3 hours  
1346 prior to samples collection. *N. benthamiana* leaves were infiltrated with water or  
1347 5  $\mu$ M eBL (PhytoTechnology Laboratories) infiltration solution (10  $\mu$ L eBL 5mM  
1348 stock solution in 10 mL H<sub>2</sub>O), made from a 5 mM stock solutions freshly  
1349 prepared in 80% (v/v) ethanol.

1350

1351 For brassinazole (BRZ) treatment experiments, the agroinfiltration solution was  
1352 supplemented with either mock (BRZ solvent as control) or 5  $\mu$ M BRZ (TCI  
1353 Europe). After infiltration, *N. benthamiana* plants were kept in the greenhouse  
1354 and analyzed 2 days later.

1355

### 1356 **Transient Expression in Arabidopsis NahG plants**

1357 *Agrobacterium tumefaciens*-mediated expression in Arabidopsis NahG plants<sup>53</sup>  
1358 was performed as described for transient expression in *N. benthamiana* with  
1359 some modifications. *Agrobacterium* strains were resuspended with an equal  
1360 OD<sub>600</sub> in infiltration solution to obtain a total OD<sub>600</sub> of 0.05 for injection into  
1361 abaxial leaves side of 4 to 5-week-old Arabidopsis plants. At least 6 plants per  
1362 co-infiltration mixture and 4 leaves per plant were used per experiment.

1363

### 1364 **Recombinant Protein Purification and In Vitro Pull-down Assay**

1365 The coding sequences of wild-type BRI1 cytoplasmatic domain (residues 814–  
1366 1196), BRI1 cytoplasmatic domain JMCT9D (residues 250–662), TTL3 $\Delta$ N1  
1367 (residuos 204-691) and TTL3 $\Delta$ N3 (residuos 567-691) were cloned as described  
1368 in **Plasmid Constructs** section to generate MBP-BRI1cyt, MBP-BRI1cyt<sup>JMCT9D</sup>,  
1369 GST-TTL3 $\Delta$ N1 and GST-TTL3 $\Delta$ N3 constructs. Recombinant proteins were  
1370 expressed in *E. coli* strain BL21 (DE3) and extracted using Buffer A (140mM  
1371 NaCl, 2.7mM KCl, 10mM Na<sub>2</sub>HPO<sub>4</sub>, 1.8mM KH<sub>2</sub>PO<sub>4</sub>, 1% Triton X-100, pH 8,  
1372 supplemented with 1 mM PMSF, 0.2  $\mu$ L/10 mL of Benzonase Nuclease  
1373 (Sigma), and 1 mg/mL Lisozyme). MBP and GST fusion proteins were purified  
1374 with Glutathione Sepharose 4B GST-tagged protein purification resin (GE

1375 Healthcare) or MBP binding protein coupled to agarose beads (MBP-Trap\_A,  
1376 Chromotek), respectively, according to the manufactures.  
1377 To investigate protein-protein interactions, the GST-tagged proteins were first  
1378 capture by the glutathione agarose-coated beads and then incubated with the  
1379 MBP-tagged proteins in dilution/wash buffer [50 mM Tris-HCl, pH 7.5; 150 mM  
1380 NaCl; 10% glycerol; 10 mM EDTA, pH 8; 10 mM DTT; 0,5 mM PMSF; 1% (v/v)  
1381 P9599 protease inhibitor cocktail (Sigma)] at 4°C during 1 hour in a end-over-  
1382 end rocker. Protein-protein interaction complexes bound to the glutathione  
1383 agarose-coated beads were pulled down, washed three times with the  
1384 dilution/wash buffer and analyzed by western blot as described in the **western**  
1385 **blot** section.  
1386 Immunoblotted GST and MBP-tagged protein were detected using an anti-GST  
1387 antibody (Sigma G7781; Dilution 1:10000) and a specific anti-BRI1 antibody <sup>71</sup>  
1388 (Dilution 1:2000) as described in the “**Western Blot Analysis**” section.  
1389

#### 1390 **Protein extraction and Co-Immunoprecipitation in *N. benthamiana***

1391 Protein extraction and Co-Immunoprecipitation in *N. benthamiana* were  
1392 performed as previsouly described <sup>80</sup> with some modifications. Briefly, Four-  
1393 week-old *N. benthamiana* plants were used for transient expression assays as  
1394 described in **Transient expression in *N. benthamiana*** section. Leaves were  
1395 grounded to fine powder in liquid nitrogen. Approximated 0,5g of grounded  
1396 leaves per sample were used and total proteins were then extracted with  
1397 extraction buffer [50 mM Tris-HCl, pH 7.5; 150 mM NaCl; 10% glycerol; 10 mM  
1398 EDTA, pH 8; 1 mM NaF; 1 mM Na<sub>2</sub>MoO<sub>4</sub>·2H<sub>2</sub>O; 10 mM DTT; 0,5 mM PMSF;  
1399 1% (v/v) P9599 protease inhibitor cocktail (Sigma); Nonidet P-40, CAS: 9036-  
1400 19-5 (USB Amersham life science) 0,5% (v/v) for CoIP involving  
1401 transmembrane proteins BRI1 and BAK1, and 0,2% (v/v) for the rest of CoIP]  
1402 added at 2 mL/g of powder using an end-over-end rocker during 30 minutes at  
1403 4°C. Samples were centrifuged 20 minutes at 4 °C and 9000 g. Supernatants  
1404 (approximated 4 mg/mL protein) were filtered by gravity through Poly-Prep  
1405 Chromatography Columns (#731-1550 Bio-Rad) and 100 µL were saved to  
1406 analyze by western blot as input. The remaining supernatants were incubated 2  
1407 hours at 4 °C with 15 µL GFP-Trap coupled to agarose beads (Chromotek) in

1408 an end-over-end rocker. During incubation of protein samples with GFP-Trap  
1409 beads the final concentration of detergent (Nonidet P-40) was adjusted to 0,2%  
1410 (v/v) in all cases to avoid unspecific binding to the matrix as recommended by  
1411 the manufacturer. Following incubation, the beads were collected and washed  
1412 four times with the wash buffer (similar to extraction buffer but without  
1413 detergent). Finally, beads were resuspended in 75  $\mu$ L of 2x concentrated  
1414 Laemmli Sample Buffer and heated at 60°C 30 minutes (for CoIP involving  
1415 transmembrane proteins BRI1 and BAK1) or (70°C for 20 minutes (for the rest  
1416 of CoIPs) to dissociate immunocomplexes from the beads. Total (input),  
1417 immunoprecipitated (IP) and Co-Immunoprecipitated (CoIP) proteins were  
1418 separated in a 10% SDS-PAGE gel, and analyzed as described in the **Western**  
1419 **Blot Analysis** section.

1420

#### 1421 **Bimolecular Fluorescence Complementation (BiFC) Assays**

1422 Leaves were co-agroinfiltrated as described in the **Agrobacterium-Mediated**  
1423 **Transient Expression in *Nicotiana benthamiana*** section with the  
1424 *Agrobacterium* strain harboring a construct to express a given protein (Protein  
1425 A) fused to the N-terminus half of the YFP (Protein A-nYFP) and the BiFC  
1426 partner protein (Protein B) fused to the C-terminus half of the YFP (Protein B-  
1427 cYFP), and the other way around (Protein A-cYFP and Protein B-nYFP) to test  
1428 both BiFC directions. Leaves were observed under the confocal microscope two  
1429 days after infiltration, as described in **Confocal Imaging of Arabidopsis and**  
1430 ***Nicotiana benthamiana*** section.

1431

#### 1432 **Confocal Imaging of Arabidopsis and *N. benthamiana***

1433 Arabidopsis seedlings were germinated in half-strength Murashige-Skoog agar  
1434 solidified medium (1% agar (w/v) for vertical growth) supplemented with 1.5%  
1435 sucrose. For eBL treatment analysis, 4-day-old seedling were incubated in 2 mL  
1436 of half-strength Murashige and Skoog medium supplemented with 1,5% (w/v)  
1437 sucrose containing either mock (eBL solvent as control) or 1  $\mu$ M eBL



1438 (PhytoTechnology Laboratories). For BRZ/eBL treatment analysis, seedling with  
1439 three days and an half were incubated in 2 mL of half-strength Murashige and  
1440 Skoog medium supplemented with 1% (w/v) sucrose, containing either mock  
1441 (BRZ solvent as control) or 5  $\mu$ M BRZ (TCI Europe) for 12 hours (overnight).  
1442 The next morning samples were further treated with mock or 1  $\mu$ M eBL  
1443 (PhytoTechnology Laboratories) for another 1 hour before being analyzed by  
1444 confocal microscopy. The eBL (PhytoTechnology Laboratories) and BRZ (TCI  
1445 Europe) were added from a 5 mM stock solutions freshly prepared in 80% (v/v)  
1446 ethanol. For visualizations of plasma membrane, seedlings were incubated in 1  
1447 mL ddH<sub>2</sub>O containing 1  $\mu$ g/mL FM4-64 (Invitrogen Molecular Probes) prepared  
1448 from a 1 mg/mL stock solution for 3-4 minutes, rinsed in ddH<sub>2</sub>O to remove the  
1449 excess of stain and visualized under confocal microscopy.

1450

1451 For confocal imaging of *Nicotiana benthamiana* leaves in co-expression and  
1452 BiFC experiments, GFP or YFP fluorescence of the lower epidermis of leaf was  
1453 visualized with the confocal 2 days after infiltration.

1454

1455 Confocal imaging of *Arabidopsis NahG* plants was performed as described for  
1456 *Nicotiana benthamiana*, but in this case, images are a maximum Z-projection of  
1457 seven 1  $\mu$ m spaced confocal planes from the cell equatorial plane to the cell  
1458 surface.

1459

1460 All confocal images were obtained using a Leica TCS SP5 II confocal  
1461 microscope equipped with a 488-nm argon laser for GFP and YFP, and a 561-  
1462 nm He-Ne laser for FM4-64. Leica LAS AF Lite platform and the Java-based  
1463 image-processing program FIJI<sup>81,82</sup> were used in the processing of all  
1464 microscopy images.

1465

## 1466 **Stereo Microscopy of Arabidopsis Seedlings**

1467 Representative images of *Arabidopsis* seedlings were acquired using the Nikon  
1468 Eclipse Ti basic Fluorescence Microscope system with filter for GFP. Wilde-type  
1469 Col-0 *Arabidopsis* seedlings were used as negative control for GFP auto-  
1470 florescence.

## 1471 **GUS Staining Assay**

1472 Four-day-old seedlings were transferred to a medium containing 0,2  $\mu$ M eBL  
1473 (PhytoTechnology Laboratories) during 24 hours and then stained for GUS  
1474 activity. Plant tissues were immersed in histochemical GUS staining buffer  
1475 (100mM NaPO<sub>4</sub> pH7, 0.5 mM K<sub>3</sub>[Fe(CN)<sub>6</sub>], 0.5 mM K<sub>4</sub>[Fe(CN)<sub>6</sub>], 20% Methanol,  
1476 0.3% Triton X-100 and 2 mM 5-Bromo-4-chloro-3-indoxyl-beta-D-glucuronide  
1477 cyclohexylammonium (X-gluc) (Gold Biotechnology, USA)) on multi-well plates,  
1478 vacuum-infiltrated (60 cm Hg) for 10 minutes three times, and then wrapped in  
1479 aluminum foil and incubated at 37°C for 12 hours. Samples were then washed  
1480 several times with 95% ethanol until complete tissue clarification, stored in 50%  
1481 glycerol and photographed using the Nikon AZ100 Multizoom microscope  
1482 system.

1483

## 1484 **Protoplasts Transient Expression Assays**

1485 Protoplasts extraction and transfection was performed as previously described  
1486 <sup>83</sup>. Briefly, leaves from 5-week-old Arabidopsis Col-0 grown at 10-hour daylight  
1487 photoperiod were cut to strips and digested for 3 hours in the darkness at room  
1488 temperature. Protoplasts were then washed and resuspended to a  
1489 concentration of  $5 \times 10^5$  protoplasts/mL before PEG-mediated transfection for 10  
1490 minutes. Twenty microliters  $\mu$ l of plasmid expressing GFP or 100  $\mu$ l of plasmids  
1491 expressing TTL3-GFP/BZR1-HA were used to transfect 2 mL protoplasts for  
1492 each transfection. All the plasmids were used at a concentration of 1  $\mu$ g/ $\mu$ l. The  
1493 transfected protoplasts were incubated for 6 hours at room temperature and  
1494 collected for protein extraction and immunoprecipitation, as described for *N.*  
1495 *benthamiana* samples.

1496

## 1497 **Yeast Two-Hybrid Assay**

1498 The Gal4-based yeast two-hybrid system (Clontech Laboratories Inc.) was used  
1499 for testing the interaction between TTL3 and different components of the  
1500 brassinosteroid signalling pathway. The bait and prey constructs are explained

1501 in the “**Plasmid Constructs**” section. The bait and prey plasmids were  
1502 transformed into *Saccharomyces cerevisiae* strain AH109 as previously  
1503 described<sup>84</sup> and transformants were grown on plasmid-selective media (SD/-  
1504 Trp-Leu). Plates were incubated at 28 °C for 4 days and independent colonies  
1505 for each bait-prey combination were resuspended in 200 µl of sterile water. 10-  
1506 fold serial dilutions were made and 5 µl of each dilution were spotted onto three  
1507 alternative interaction-selective medium (SD/-Trp-Leu-His+3-AT (3-amino-1, 2,  
1508 4-triazole, 2mM), SD/-Trp-Leu-Ade, and SD/-Trp-Leu-Ade+3-AT). Plates were  
1509 incubated at 28 °C and photographed 3 or 7 days later.

1510

### 1511 **Yeast Two-Hybrid Protein Extraction**

1512

1513 For immunoblot analysis, one or two independent yeast co-transformants (a and  
1514 b) for each bait-prey plasmid combination were grown in 50 mL of SD/-Leu-Trp  
1515 to an OD<sub>600</sub> of 0.7-1. Cultures were centrifuged at 4.000 rpm for 3 minutes.  
1516 The resulting pellet was washed once with cold water and resuspended in 200  
1517 µl of RIPA buffer (2 mM sodium phosphate buffer pH 7, 0,2% Triton X-100,  
1518 0,02% -w/v- SDS, 0,2 mM EDTA pH 8, 10 mM ClNa) containing protease  
1519 inhibitor (1 tablet/10mL, cOmplete, Mini, EDTA-free Protease Inhibitor Cocktail,  
1520 Roche) Glass beads (500 µl, 425-600 um, Sigma) were added and the sample  
1521 was vortexed in FastPrep™ FP120 (BIO 101) at power setting 5.5 for two 15  
1522 seconds intervals separated by 1 minute intervals on ice. Then 400 µl RIPA  
1523 buffer with protease inhibitors were added and the sample was vigorously  
1524 vortexed. The supernatant was recovered, and the protein concentration was  
1525 determined using Bradford assays. Total protein (50 µg) was resolved on 10%  
1526 polyacrylamide/SDS gels and analyzed by immunoblotting using a anti-Myc Tag  
1527 (1:2000, Abgent) which is transcriptionally fused to Gal4BD, as described in the  
1528 “**Western Blot Analysis**” section

1529

1530

1531

## 1532 **Extraction of Total Protein from Arabidopsis**

1533 Arabidopsis tissue was grounded to fine powder in liquid nitrogen.  
1534 Approximated 100 mg of grounded tissue per sample were used for total  
1535 proteins extraction. Denatured protein extracts were obtained by homogenizing  
1536 and incubating plant material in 200  $\mu$ L of 2X Laemmli buffer [125 mM Tris-HCl  
1537 pH 6.8; 4% (w/v) SDS; 20% (v/v) Glycerol; 2% (v/v) Beta-mercaptoethanol;  
1538 0,01% (w/v); Bromophenol blue] for 5 minutes at 95°C, centrifuged (5 minutes,  
1539 20 000 g) and the total proteins from supernatant were separated in a 10%  
1540 SDS-PAGE gel, and analyzed as described in the **Western Blot Analysis**  
1541 section.

1542

## 1543 **Western Blot Analysis**

1544 Proteins separated by SDS-PAGE polyacrylamide gel electrophoresis were  
1545 electroblotted using Trans-blot Turbo Transfer System (BioRAD) onto  
1546 polyvinylidene difluoride (PVDF) membranes (Immobilon-P; Millipore) following  
1547 instructions by the manufacturer (preprogramed protocols optimized for the  
1548 molecular weight of the proteins of interest). PVDF membranes, containing  
1549 electroblotted proteins, were then incubated with the appropriate primary  
1550 antibody followed by the appropriate secondary second peroxidase-conjugated  
1551 antibody. In addition to the primary antibodies described in the previous  
1552 methods section, the following primary antibodies were used for detection of  
1553 epitope-tagged proteins: mouse monoclonal anti-GFP clone B-2 (1:600; Santa  
1554 Cruz Biotechnology); mouse monoclonal anti-HA clone HA-7 (1:3000; Sigma-  
1555 Aldrich); rabbit polyclonal anti-mCherry (1:3000 GeneTex). The secondary  
1556 antibodies used in the present study were: anti-mouse IgG whole  
1557 molecule-Peroxidase (1:80000; Sigma-Aldrich) and anti-rabbit IgG whole  
1558 molecule-Peroxidase (1:14000 or 1:80000; Sigma-Aldrich)  
1559 Proteins and epitope-tagged proteins on immunoblots were detected by using  
1560 the Clarity ECL Western Blotting Substrate or SuperSignal West Femto  
1561 Maximum Sensitivity Substrate according to the manufacturer's instructions,  
1562 and images of different time exposures were acquired by using the Chemidoc

1563 XRS+System (Biorad). SDS-PAGE polyacrylamide gels and immunoblotted  
1564 PVDF membranes were stained with Coomassie blue for confirming equal  
1565 loading of the different samples in a given experiment.

1566

1567

## 1568 **QUANTIFICATION AND STATISTICAL ANALYSIS**

### 1569 **Arabidopsis eFP Browser Data Analysis**

1570 Gene expression level data from hormone responses was retrieved from  
1571 Arabidopsis eFP Browser (Hormone Series) web site available from the  
1572 following link: <http://bar.utoronto.ca/efp/cgi-bin/efpWeb.cgi><sup>85</sup>. Data used for the  
1573 analysis was obtained from 7-day-old wild-type seedlings. Differential  
1574 expression was calculated by dividing the expression value of each gene in a  
1575 given hormone treatment by the corresponding mock control (fold-change of  
1576 hormone treatment relative to the mock). Hormone gene expression response  
1577 calculation and Heatmap was obtained using Microsoft Office Excel (Microsoft).  
1578 Heatmap red colors represent induction and blue colors represent repression as  
1579 response to the indicated hormone.

1580

### 1581 **Quantification of Fluorescent Protein Signal**

1582 For quantification of fluorescent protein signal in plasma membrane vs  
1583 cytoplasm all images were analyzed using FIJI software<sup>81,82</sup>. To measure the  
1584 ratio between nuclear and cytoplasmic signals, a small area of fixed size (8  
1585 pixels) was drawn, and measurements of integrated densities were taken from  
1586 representative areas within the plasma membrane and cytoplasm of each cell.  
1587 To delimitate de plasma membrane area, FM4-64 was used to stain the cells.  
1588 Average ratios between plasma membrane and cytoplasmic signal intensities  
1589 were calculated based on measures from 3 cells per plant. n=10 plants  
1590 analyzed (3 cells per plant). This experiment was repeated twice with similar  
1591 results.

1592 Additionally, for quantification of fluorescent protein signal, lines scan  
1593 measurements spanning membrane and cytoplasm were carried out from

1594 images using FIJI<sup>81,82</sup> software, and representative plot profiles of sample  
1595 measurements are presented in **Figure 3I**.

1596

### 1597 **Statistics**

1598

1599 Band intensity quantification of protein signal detected by western blot,  
1600 integrated densities from representative areas within the plasma membrane and  
1601 cytoplasm of each cell analyzed by confocal imaging, as well as Arabidopsis  
1602 root and hypocotyl lengths were measured from images using FIJI<sup>81,82</sup>  
1603 software. The data for qRT-PCR were gathered with MyiQ optical system  
1604 software (Bio Rad). For statistical analysis unpaired t-test was performed using  
1605 GraphPad Prism version 6.00 for Mac (GraphPad Software, La Jolla California  
1606 USA, [www.graphpad.com](http://www.graphpad.com)). Asterisks indicate statistical differences between  
1607 mutant vs Col-0, unless otherwise specified, as determined by the unpaired *t*-  
1608 *test* (\*  $P \leq 0.05$ , \*\*  $P \leq 0.01$ , \*\*\*  $P \leq 0.001$  \*\*\*\*  $P \leq 0.0001$ ). Data represent  
1609 mean values, error bars are SEM. In figure legends, n means number of plants  
1610 for phenotypic analysis, numbers of biological replicates (3 technical replicates  
1611 per biological replicate) for qRT-PCR analysis, or number of cells (3  
1612 independent measurements per performed per cell) analyzed for quantification  
1613 of fluorescent protein signal in plasma membrane vs cytoplasm. The  
1614 experiments were repeated at least three times with similar results.

1615

### 1616 ***In silico* Three-Dimensional Structural Model of TTL3**

1617 The *in silico* protein structure prediction for TTL3 protein was built by submitting  
1618 primary sequences to the I-TASSER server<sup>69</sup> and processed by PyMOL  
1619 (Schrödinger). Intrinsically disordered regions (IDRs) were predicted using  
1620 GlobPlot 2, available in the web page (<http://globplot.embl.de/>).  
1621 Tetratricopeptide Repeat (TPR) and thioredoxin-like (TPRX) domains were  
1622 predicted using SMART/Pfam server and were previously described<sup>12</sup>.

1623

1624

1625 **REFERENCES**

- 1626 1. Meldau, S., Erb, M. & Baldwin, I. T. Defence on demand: mechanisms  
1627 behind optimal defence patterns. *Ann. Bot.* **110**, 1503–1514 (2012).
- 1628 2. Chaiwanon, J., Wang, W., Zhu, J.-Y., Oh, E. & Wang, Z.-Y. Information  
1629 Integration and Communication in Plant Growth Regulation. *Cell* **164**,  
1630 1257–1268 (2016).
- 1631 3. Belkhadir, Y., Yang, L., Hetzel, J., Dangl, J. L. & Chory, J. The growth–  
1632 defense pivot: crisis management in plants mediated by LRR-RK surface  
1633 receptors. *Trends Biochem Sci* **39**, 447–456 (2014).
- 1634 4. Jaillais, Y. & Vert, G. Brassinosteroid signaling and BRI1 dynamics went  
1635 underground. *Curr. Opin. Plant Biol.* **33**, 92–100 (2016).
- 1636 5. Belkhadir, Y. & Jaillais, Y. The molecular circuitry of brassinosteroid  
1637 signaling. *New Phytol.* **206**, 522–540 (2015).
- 1638 6. Lozano-Durán, R. & Zipfel, C. Trade-off between growth and immunity:  
1639 role of brassinosteroids. *Trends Plant Sci.* **20**, 12–19 (2015).
- 1640 7. Nolan, T. M. *et al.* Selective Autophagy of BES1 Mediated by DSK2  
1641 Balances Plant Growth and Survival. *Dev. Cell* **41**, 33–46.e7 (2017).
- 1642 8. Zhang, Z. *et al.* TOR Signaling Promotes Accumulation of BZR1 to  
1643 Balance Growth with Carbon Availability in Arabidopsis. *Curr. Biol.* **26**,  
1644 1854–1860 (2016).
- 1645 9. Tian, Y. *et al.* Hydrogen peroxide positively regulates brassinosteroid  
1646 signaling through oxidation of the BRASSINAZOLE-RESISTANT1  
1647 transcription factor. *Nat Commun* **9**, 1063–13 (2018).
- 1648 10. Wang, W., Bai, M.-Y. & Wang, Z.-Y. The brassinosteroid signaling  
1649 network—a paradigm of signal integration. *Curr. Opin. Plant Biol.* **21**, 147–  
1650 153 (2014).
- 1651 11. Rosado, A. *et al.* The Arabidopsis tetratricopeptide repeat-containing  
1652 protein TTL1 is required for osmotic stress responses and abscisic acid  
1653 sensitivity. *Plant Physiol.* **142**, 1113–1126 (2006).
- 1654 12. Lakhssassi, N. *et al.* The Arabidopsis tetratricopeptide thiooxidin-like  
1655 gene family is required for osmotic stress tolerance and male  
1656 sporogenesis. *Plant Physiol.* **158**, 1252–1266 (2012).
- 1657 13. Ceserani, T., Trofka, A., Gandotra, N. & Nelson, T. VH1/BRL2 receptor-



- 1658 like kinase interacts with vascular-specific adaptor proteins VIT and VIK to  
1659 influence leaf venation. *The Plant Journal* **57**, 1000–1014 (2009).
- 1660 14. Prasad, B. D., Goel, S. & Krishna, P. In silico identification of carboxylate  
1661 clamp type tetratricopeptide repeat proteins in Arabidopsis and rice as  
1662 putative co-chaperones of Hsp90/Hsp70. *PLoS ONE* **5**, e12761 (2010).
- 1663 15. Samakovli, D., Margaritopoulou, T., Prassinou, C., Milioni, D. &  
1664 Hatzopoulos, P. Brassinosteroid nuclear signaling recruits HSP90 activity.  
1665 *New Phytol.* **203**, 743–757 (2014).
- 1666 16. Shigeta, T. *et al.* Heat shock protein 90 acts in brassinosteroid signaling  
1667 through interaction with BES1/BZR1 transcription factor. *J. Plant Physiol.*  
1668 **178**, 69–73 (2015).
- 1669 17. Shigeta, T. *et al.* Molecular evidence of the involvement of heat shock  
1670 protein 90 in brassinosteroid signaling in Arabidopsis T87 cultured cells.  
1671 *Plant Cell Rep.* **33**, 499–510 (2014).
- 1672 18. Lachowiec, J. *et al.* The protein chaperone HSP90 can facilitate the  
1673 divergence of gene duplicates. *Genetics* **193**, 1269–1277 (2013).
- 1674 19. Yang, C.-J., Zhang, C., Lu, Y.-N., Jin, J.-Q. & Wang, X.-L. The  
1675 mechanisms of brassinosteroids' action: from signal transduction to plant  
1676 development. *Mol Plant* **4**, 588–600 (2011).
- 1677 20. Blatch, G. L. & Lässle, M. The tetratricopeptide repeat: a structural motif  
1678 mediating protein-protein interactions - Blatch - 1999 - BioEssays - Wiley  
1679 Online Library. *Bioessays* (1999).
- 1680 21. D'Andrea, L. D. & Regan, L. TPR proteins: the versatile helix. *Trends*  
1681 *Biochem Sci* **28**, 655–662 (2003).
- 1682 22. Yang, J. *et al.* Molecular basis for TPR domain-mediated regulation of  
1683 protein phosphatase 5. *EMBO J* **24**, 1–10 (2005).
- 1684 23. Caño-Delgado, A. *et al.* BRL1 and BRL3 are novel brassinosteroid  
1685 receptors that function in vascular differentiation in Arabidopsis.  
1686 *Development* **131**, 5341–5351 (2004).
- 1687 24. Habchi, J., Tompa, P., Longhi, S. & Uversky, V. N. Introducing Protein  
1688 Intrinsic Disorder. *Chem. Rev.* **114**, 6561–6588 (2014).
- 1689 25. Ma, X., Xu, G., He, P. & Shan, L. SERKING Coreceptors for Receptors.  
1690 *Trends Plant Sci.* **21**, 1017–1033 (2016).
- 1691 26. Gou, X. *et al.* Genetic evidence for an indispensable role of somatic

- 1692 embryogenesis receptor kinases in brassinosteroid signaling. *PLoS Genet*  
1693 **8**, e1002452 (2012).
- 1694 27. He, K. *et al.* BAK1 and BKK1 regulate brassinosteroid-dependent growth  
1695 and brassinosteroid-independent cell-death pathways. *CURBIO* **17**,  
1696 1109–1115 (2007).
- 1697 28. Chinchilla, D. *et al.* A flagellin-induced complex of the receptor FLS2 and  
1698 BAK1 initiates plant defence. *Nature* **448**, 497–500 (2007).
- 1699 29. Schwessinger, B. *et al.* Phosphorylation-Dependent Differential  
1700 Regulation of Plant Growth, Cell Death, and Innate Immunity by the  
1701 Regulatory Receptor-Like Kinase BAK1. *PLoS Genet* **7**, e1002046  
1702 (2011).
- 1703 30. van Esse, W., van Mourik, S., Albrecht, C., van Leeuwen, J. & de Vries,  
1704 S. A Mathematical Model for the Coreceptors SOMATIC  
1705 EMBRYOGENESIS RECEPTOR-LIKE KINASE1 and SOMATIC  
1706 EMBRYOGENESIS RECEPTOR-LIKE KINASE3 in BRASSINOSTEROID  
1707 INSENSITIVE1-Mediated Signaling. *Plant Physiol.* **163**, 1472–1481  
1708 (2013).
- 1709 31. Du, J. *et al.* Somatic Embryogenesis Receptor Kinases Control Root  
1710 Development Mainly via Brassinosteroid-Independent Actions in  
1711 *Arabidopsis thaliana*. *J Integrative Plant Biology* **54**, 388–399 (2012).
- 1712 32. Bernardo-García, S. *et al.* BR-dependent phosphorylation modulates  
1713 PIF4 transcriptional activity and shapes diurnal hypocotyl growth. *Genes*  
1714 *Dev.* **28**, 1681–1694 (2014).
- 1715 33. Zhang, Y. *et al.* Brassinosteroid is required for sugar promotion of  
1716 hypocotyl elongation in *Arabidopsis* in darkness. *Planta* **242**, 881–893  
1717 (2015).
- 1718 34. Li, J. *et al.* BAK1, an *Arabidopsis* LRR receptor-like protein kinase,  
1719 interacts with BRI1 and modulates brassinosteroid signaling. *Cell* **110**,  
1720 213–222 (2002).
- 1721 35. Nam, K. H. & Li, J. BRI1/BAK1, a receptor kinase pair mediating  
1722 brassinosteroid signaling. *Cell* **110**, 203–212 (2002).
- 1723 36. Wang, R. *et al.* The Brassinosteroid-Activated BRI1 Receptor Kinase Is  
1724 Switched off by Dephosphorylation Mediated by Cytoplasm-Localized  
1725 PP2A B' Subunits. *Mol Plant* **9**, 148–157 (2016).

- 1726 37. Lin, W. *et al.* Inverse modulation of plant immune and brassinosteroid  
1727 signaling pathways by the receptor-like cytoplasmic kinase BIK1. *Proc.*  
1728 *Natl. Acad. Sci. U.S.A.* **110**, 12114–12119 (2013).
- 1729 38. Tanaka, K. *et al.* Brassinosteroid homeostasis in Arabidopsis is ensured  
1730 by feedback expressions of multiple genes involved in its metabolism.  
1731 *Plant Physiol.* **138**, 1117–1125 (2005).
- 1732 39. Vriet, C., Russinova, E. & Reuzeau, C. From squalene to brassinolide: the  
1733 steroid metabolic and signaling pathways across the plant kingdom. *Mol*  
1734 *Plant* **6**, 1738–1757 (2013).
- 1735 40. Chung, Y. & Choe, S. The Regulation of Brassinosteroid Biosynthesis in  
1736 Arabidopsis. *Critical Reviews in Plant Sciences* **32**, 396–410 (2013).
- 1737 41. Wilma van Esse, G. *et al.* Quantification of the brassinosteroid  
1738 insensitive1 receptor in planta. *Plant Physiol.* **156**, 1691–1700 (2011).
- 1739 42. Fàbregas, N. *et al.* The brassinosteroid insensitive1-like3 signalosome  
1740 complex regulates Arabidopsis root development. *Plant Cell* **25**, 3377–  
1741 3388 (2013).
- 1742 43. Geldner, N., Hyman, D. L., Wang, X., Schumacher, K. & Chory, J.  
1743 Endosomal signaling of plant steroid receptor kinase BRI1. *Genes Dev.*  
1744 **21**, 1598–1602 (2007).
- 1745 44. Vida, T. A. A new vital stain for visualizing vacuolar membrane dynamics  
1746 and endocytosis in yeast. *The Journal of Cell Biology* **128**, 779–792  
1747 (1995).
- 1748 45. Wang, X. & Chory, J. Brassinosteroids regulate dissociation of BKI1, a  
1749 negative regulator of BRI1 signaling, from the plasma membrane.  
1750 *Science* **313**, 1118–1122 (2006).
- 1751 46. Maselli, G. A. *et al.* Revisiting the evolutionary history and roles of protein  
1752 phosphatases with Kelch-like domains in plants. *Plant Physiol.* **164**,  
1753 1527–1541 (2014).
- 1754 47. Vert, G. & Chory, J. Downstream nuclear events in brassinosteroid  
1755 signalling. *Nature* **441**, 96–100 (2006).
- 1756 48. Gampala, S. S. *et al.* An essential role for 14-3-3 proteins in  
1757 brassinosteroid signal transduction in Arabidopsis. *Dev. Cell* **13**, 177–189  
1758 (2007).
- 1759 49. Ryu, H. *et al.* Nucleocytoplasmic shuttling of BZR1 mediated by

- 1760 phosphorylation is essential in Arabidopsis brassinosteroid signaling.  
1761 *Plant Cell* **19**, 2749–2762 (2007).
- 1762 50. Shimada, S. *et al.* Formation and dissociation of the BSS1 protein  
1763 complex regulates plant development via brassinosteroid signaling. *THE*  
1764 *PLANT CELL ONLINE* **27**, 375–390 (2015).
- 1765 51. He, J. X., Gendron, J. M., Yang, Y., Li, J. & Wang, Z. Y. The GSK3-like  
1766 kinase BIN2 phosphorylates and destabilizes BZR1, a positive regulator  
1767 of the brassinosteroid signaling pathway in Arabidopsis. *Proc. Natl. Acad.*  
1768 *Sci. U.S.A.* **99**, 10185–10190 (2002).
- 1769 52. Kim, T.-W. *et al.* Brassinosteroid signal transduction from cell-surface  
1770 receptor kinases to nuclear transcription factors. *Nat. Cell Biol.* **11**, 1254–  
1771 1260 (2009).
- 1772 53. Rosas-Diaz, T. *et al.* Arabidopsis NahG plants as a suitable and efficient  
1773 system for transient expression using *Agrobacterium tumefaciens*. *Mol*  
1774 *Plant* (2016). doi:10.1016/j.molp.2016.11.005
- 1775 54. Sreeramulu, S. *et al.* BSKs are partially redundant positive regulators of  
1776 brassinosteroid signaling in Arabidopsis. *Plant J* **74**, 905–919 (2013).
- 1777 55. Wang, C. *et al.* Identification of BZR1-interacting proteins as potential  
1778 components of the brassinosteroid signaling pathway in Arabidopsis  
1779 through tandem affinity purification. *Mol. Cell Proteomics* **12**, 3653–3665  
1780 (2013).
- 1781 56. González-García, M.-P. *et al.* Brassinosteroids control meristem size by  
1782 promoting cell cycle progression in Arabidopsis roots. *Development* **138**,  
1783 849–859 (2011).
- 1784 57. Tang, W. *et al.* PP2A activates brassinosteroid-responsive  
1785 gene expression and plant growth by dephosphorylating BZR1. *Nat. Cell*  
1786 *Biol.* **13**, 124–131 (2011).
- 1787 58. Soutourina, J. Transcription regulation by the Mediator complex. *Nature*  
1788 *Publishing Group* 1–13 (2017). doi:10.1038/nrm.2017.115
- 1789 59. Wang, Z.-Y., Bai, M.-Y., Oh, E. & Zhu, J.-Y. Brassinosteroid signaling  
1790 network and regulation of photomorphogenesis. *Annu. Rev. Genet.* **46**,  
1791 701–724 (2012).
- 1792 60. Yin, Y. *et al.* BES1 accumulates in the nucleus in response to  
1793 brassinosteroids to regulate gene expression and promote stem

- 1794 elongation. *Cell* **109**, 181–191 (2002).
- 1795 61. Li, V. S. W. *et al.* Wnt Signaling through Inhibition of b-Catenin  
1796 Degradation in an Intact Axin1 Complex. *Cell* **149**, 1245–1256 (2012).
- 1797 62. Clevers, H. & Nusse, R. Wnt/b-Catenin Signaling and Disease. *Cell* **149**,  
1798 1192–1205 (2012).
- 1799 63. Mora-Garcia, S. Nuclear protein phosphatases with Kelch-repeat domains  
1800 modulate the response to brassinosteroids in Arabidopsis. *Genes Dev.*  
1801 **18**, 448–460 (2004).
- 1802 64. Peng, P., Yan, Z., Zhu, Y. & Li, J. Regulation of the Arabidopsis GSK3-  
1803 like kinase BRASSINOSTEROID-INSENSITIVE 2 through proteasome-  
1804 mediated protein degradation. *Mol Plant* **1**, 338–346 (2008).
- 1805 65. Kim, T.-W., Michniewicz, M., Bergmann, D. C. & Wang, Z.-Y.  
1806 Brassinosteroid regulates stomatal development by GSK3-mediated  
1807 inhibition of a MAPK pathway. *Nature* **482**, 419–422 (2012).
- 1808 66. Cai, Z. *et al.* GSK3-like kinases positively modulate abscisic acid  
1809 signaling through phosphorylating subgroup III SnRK2s in Arabidopsis.  
1810 *Proc. Natl. Acad. Sci. U.S.A.* **111**, 9651–9656 (2014).
- 1811 67. Tang, W. *et al.* BSKs mediate signal transduction from the receptor  
1812 kinase BRI1 in Arabidopsis. *Science* **321**, 557–560 (2008).
- 1813 68. Shi, H. *et al.* BR-SIGNALING KINASE1 Physically Associates with  
1814 FLAGELLIN SENSING2 and Regulates Plant Innate Immunity in  
1815 Arabidopsis. *THE PLANT CELL ONLINE* **25**, 1143–1157 (2013).
- 1816 69. Zhang, Y. I-TASSER server for protein 3D structure prediction. *BMC*  
1817 *Bioinformatics* **9**, 40 (2008).
- 1818 70. Wang, X. *et al.* Sequential Transphosphorylation of the BRI1/BAK1  
1819 Receptor Kinase Complex Impacts Early Events in Brassinosteroid  
1820 Signaling - ScienceDirect. *Dev. Cell* (2008).
- 1821 71. Bojar, D. *et al.* Crystal structures of the phosphorylated BRI1 kinase  
1822 domain and implications for brassinosteroid signal initiation. *Plant J* **78**,  
1823 31–43 (2014).
- 1824 72. Yu, X. *et al.* A brassinosteroid transcriptional network revealed by  
1825 genome-wide identification of BES1 target genes in Arabidopsis thaliana.  
1826 *Plant J* **65**, 634–646 (2011).
- 1827 73. McKinney, E. C. & Meagher, R. B. Members of the Arabidopsis actin gene

- 1828 family are widely dispersed in the genome. *Genetics* **149**, 663–675  
1829 (1998).
- 1830 74. Albrecht, C., Russinova, E., Hecht, V., Baaijens, E. & de Vries, S. The  
1831 *Arabidopsis thaliana* SOMATIC EMBRYOGENESIS RECEPTOR-LIKE  
1832 KINASES1 and 2 control male sporogenesis. *Plant Cell* **17**, 3337–3349  
1833 (2005).
- 1834 75. Lozano-Durán, R., Bourdais, G., He, S. Y. & Robatzek, S. The bacterial  
1835 effector HopM1 suppresses PAMP-triggered oxidative burst and stomatal  
1836 immunity. *New Phytol.* **202**, 259–269 (2014).
- 1837 76. Nakagawa, T. *et al.* Development of series of gateway binary vectors,  
1838 pGWBs, for realizing efficient construction of fusion genes for plant  
1839 transformation. *J. Biosci. Bioeng.* **104**, 34–41 (2007).
- 1840 77. Christian, G., Rainer, W., rg, K. J., Ralf-R, M. & Robert, H. N. New  
1841 GATEWAY vectors for High Throughput Analyses of Protein–Protein  
1842 Interactions by Bimolecular Fluorescence Complementation. *Mol Plant* **2**,  
1843 1051–1058 (2009).
- 1844 78. Clough, S. J. & Bent, A. F. Floral dip: a simplified method for  
1845 *Agrobacterium*-mediated transformation of *Arabidopsis thaliana*. *Plant J*  
1846 **16**, 735–743 (1998).
- 1847 79. Voinnet, O., Rivas, S., Mestre, P. & Baulcombe, D. An enhanced transient  
1848 expression system in plants based on suppression of gene silencing by  
1849 the p19 protein of tomato bushy stunt virus. *Plant J* **33**, 949–956 (2003).
- 1850 80. Kadota, Y., Macho, A. P. & Zipfel, C. in *Methods in Molecular Biology*  
1851 **1363**, 133–144 (Springer New York, 2016).
- 1852 81. Schneider, C. A., Rasband, W. S. & Eliceiri, K. W. NIH Image to ImageJ:  
1853 25 years of image analysis. *Nat. Methods* **9**, 671–675 (2012).
- 1854 82. Schindelin, J. *et al.* Fiji: an open-source platform for biological-image  
1855 analysis. *Nat. Methods* **9**, 676–682 (2012).
- 1856 83. Yoo, S.-D., Cho, Y.-H. & Sheen, J. *Arabidopsis* mesophyll protoplasts: a  
1857 versatile cell system for transient gene expression analysis. *Nat Protoc* **2**,  
1858 1565–1572 (2007).
- 1859 84. Gietz, R. D. & Schiestl, R. H. Transforming yeast with DNA.(Invited  
1860 chapter). *Method Mol. Cell. Biol* **5**, 255–269 (1995).
- 1861 85. Winter, D. *et al.* An ‘Electronic Fluorescent Pictograph’ browser for

1862 exploring and analyzing large-scale biological data sets. *PLoS ONE* **2**,  
1863 e718 (2007).

1864

1865

1866



1867 **Acknowledgements**

1868

1869 This work was supported the Ministerio de Economía y Competitividad  
1870 (cofinanced by the European Regional Development Fund; grants no. BIO2014-  
1871 55380-R and BIO2017-82609-R to M.A.B) and by a Formación del Personal  
1872 Investigador Fellowship from the Ministerio de Economía y Competitividad (FPI-  
1873 BES 2015-071256 to A. G-M). A.P.M. was funded by the Shanghai Center  
1874 for Plant Stress Biology (Chinese Academy of Sciences) and the Chinese 1000  
1875 Talents Program, and by grants from the Gatsby Charitable Foundation and the  
1876 European Research Council (grant 'PHOSPHinnATE') to C.Z., while working in  
1877 the C.Z. laboratory.

1878

1879 We thank Yanhai Yin and Michael Hothorn for generously providing the anti-  
1880 BES1 and the anti-BRI1 antibodies, respectively.

1881 We are grateful to Salomé Prat (*BIN2* and *BES1* expression clones), Santiago  
1882 Mora Garcia (BSU expression clone), José Alonso (GFP-tagged GW vector for  
1883 expression in protoplasts) and Xiaofeng Wang (pMAC-flag-BRI1-CD-JMCT9D,  
1884 BRI1 phosphomimetic mutant) for providing expression clones and vectors  
1885 used in the present study.

1886

1887

1888 **Author contributions**

1889

1890 All authors designed the experiments. V.A-S., A.G-M., A.C., N.L., J.P-S., Y.L.,  
1891 A.E-V., D.P., J.P-R., and A.P.M. performed the experiments and analyzed the  
1892 data. V.A-S., A.P.M., and M.A.B. wrote the manuscript. All authors commented  
1893 on the manuscript.

1894

1895

1896
